1 Article

# 2 The condition of coral reefs in Timor-Leste before 3 and after the 2016–2017 marine heatwave.

4 Catherine JS Kim<sup>1,2\*</sup>, Chris Roelfsema<sup>3</sup>, Sophie Dove<sup>1,2</sup>, Ove Hoegh-Guldberg<sup>1,2</sup>

5 <sup>1</sup> School of Biological Sciences, The University of Queensland, Brisbane, QLD 4072

6 <sup>2</sup> ARC Centre of Excellence for Coral Reef Studies, The University of Queensland, Brisbane, QLD 4072

7 <sup>3</sup> Remote Sensing Research Center, School of Earth and Environmental Sciences, The University of  
8 Queensland, Brisbane, QLD 4072

9 \* Correspondence: [c.kim@uq.edu.au](mailto:c.kim@uq.edu.au); Tel.: +617-3365-2118

10 Received: date; Accepted: date; Published: date

11 **Abstract:** El Niño Southern Oscillation global coral bleaching events are increasing in frequency;  
12 however, the severity of bleaching is not geographically uniform. There were two major objectives  
13 of the present project: 1) assess the state of reefs and coral health at several sites and 2) explore water  
14 quality and climate change impacts on Timorese reefs. The impacts of climate change (principally  
15 by following coral mortality) were surveyed on coral reefs before and after the 2016–2017  
16 underwater heatwave, using temperature loggers deployed between surveys which were compared  
17 to Coral Reef Watch (CRW) experimental virtual station sea surface temperature (SST). CRW is an  
18 important and widely used tool; however, we found the SST was significantly warmer ( $> 1^{\circ}\text{C}$ ) than  
19 *in situ* temperature during the austral summer accruing 5.79 degree heating weeks. *In situ*  
20 temperature showed no accumulation. Change in coral cover between surveys was attributed to  
21 reef heterogeneity. There were significant differences in coral cover, coral diversity, and nutrient  
22 concentrations between site and depth and a low prevalence of disease recorded in both years. The  
23 comparison of temperature and SST indicate that bleaching stress in Timor-Leste is potentially  
24 mitigated by seasonal and oceanographic dynamics. This is corroborated by Timor-Leste's location  
25 within the Indonesian ThroughFlow. Timor-Leste is a climate refugium and the immediate  
26 conservation work lies in the management of localized anthropogenic impacts on coral reefs such  
27 as sedimentation and fishing.

28 **Keywords:** coral reefs, Timor-Leste, Coral Triangle, ENSO, coral bleaching, temperature, stable  
29 isotope, coral disease, nutrients, Indonesian ThroughFlow

30  
31

## 32 1. Introduction

33 Timor-Leste is a developing country with limited infrastructure following decades of war and  
34 isolation. It is one of the poorest nations in East Asia representing one of six member-states of the  
35 Coral Triangle (CT), the global center of marine biodiversity (i.e., numbers of species), housing 29%  
36 of the world's coral reefs [1,2]. Much of this diversity, however, is under threat due to a range of  
37 growing local and global stresses [3–6]. Globally, climate change-induced coral bleaching via ocean  
38 warming and coral disease are among the main threats facing coral reefs but are understudied in the  
39 CT compared to other reef regions. Furthermore, many coral diseases have been linked to increasing  
40 ocean temperatures, nutrient pollution, sedimentation, and fishing [7–10]. Global mass coral  
41 bleaching events or heatwaves, driven by anomalous increases in sea surface temperature (SST)  
42 maintained over time, have been occurring with increasing frequency [11]. Like disease, however,  
43 there is a paucity of data concerning the incidence and severity of bleaching in the CT. Additionally,  
44 these reefs are disproportionately threatened at a local level compared to other regions of the world  
45 [1].

46 1.1 *Local threats to the coral reef of Timor-Leste*

47 In addition to the threat posed by global climate change, there are a range of local impacts on  
48 Timorese reefs. Ninety two percent of reefs are at high or very high risk due to fishing pressure,  
49 watershed-based pollution, coastal development, and pollution from marine activities (i.e., shipping,  
50 oil and gas extraction) [1]. While the extent of destructive fishing practices has been decreasing since  
51 the Indonesian occupation from 1974 to 1999 [12], there are still an estimated 5,000 fishers that focus  
52 their fishing effort, without dynamite, on the narrow, productive shelf that supports coral reefs  
53 [13,14]. Fishing markets are limited to a very localized distribution given that the infrastructure for  
54 markets (e.g., refrigeration) is undeveloped [15]. Additionally, gleaning, or harvesting invertebrates  
55 from intertidal flats for consumption, known locally as *meti*, is commonly practiced by women and  
56 children and has its own, often significant, impacts [15,16]. Similarly, agricultural practices are  
57 generally limited to small-scale, subsistence farming without the use of non-organic fertilizers and  
58 pesticides although the development of such practices is outlined to improve food security [17].

59 Watershed-based pollution is widespread due to deforested landscapes that lead to large  
60 volumes of unsettled sediment and pollution flowing downstream and into coastal waters. An  
61 estimated 24% of forests in-country have been lost from 1972 to 1999 due mostly to slash and burn  
62 agriculture and logging during the Indonesian occupation and because of its importance as fuel [18–  
63 20]. Significant development is planned over the coming decades with potential increased coastal  
64 impacts [1,18–20].

65 1.2 *Disease in the context of coral reef health*

66 While rapid ocean warming has increased mass coral bleaching and mortality [21], other  
67 consequences of stress have been increasing including the prevalence of coral disease. Coral disease  
68 has been a major contributor to the decline of corals in other regions such as the Caribbean [22], and  
69 also severely threatens reefs in the Indo-Pacific [4,23–25]. By contrast, there have been relatively fewer  
70 studies of coral disease in the CT (Table A1) [26]. In this study, diseases were defined as syndromes  
71 caused by pathogens and recorded abiotic diseases such as coral bleaching under the broad category  
72 of compromised health [26].

73 Disease and other signs of compromised physiology are one of many indicators of condition of  
74 coral reefs (loosely defined as coral health). Understanding the signs of declining coral condition has  
75 the potential to alert reef managers to potential problems (i.e., a change in the level of local threats).  
76 Therefore, it is important to document lesions, or morphologic abnormalities, predation, physical  
77 breakages (i.e., storms, anchors), and aggressive interactions which may result in tears or breaks in  
78 the tissue, partial mortality, and stress to the coral host. Disease can be endemic and highly visible  
79 [22], or present in low frequency in any given population [25]. Tracking disease and other signs of  
80 compromised health through time can be paired with other datasets (i.e., herbivore biomass,  
81 hurricane incidence, environmental parameters, etc.), and is related to key physiological parameters  
82 such as growth rates, fecundity, and community composition of reefs [27]. At most sites in Timor-  
83 Leste, these types of measurements are absent, highlighting the importance of the present study as a  
84 crucial baseline on the conditions of important marine resources.

85 1.3 *Water quality and coral reefs long the north coast of Timor-Leste*

86 Pollution arising from disturbed coastal regions and watersheds poses a serious threat to coral  
87 reefs. This type of pollution includes a wide range of compounds such as agrichemicals (i.e.,  
88 pesticides), inorganic nutrients (i.e., nitrate, ammonia, and phosphate), soils and sediments, and fossil  
89 fuel residues that flow from disturbed landscapes. Many of these compounds negatively affect coral  
90 physiology by reducing calcification rates, fecundity, fertilization success, and larval development  
91 [28]. This can degrade reef communities, reducing coral cover, community composition diversity, and  
92 structural complexity [29,30]. High levels of marine pollution can increase the prevalence and severity  
93 of disease and susceptibility to bleaching [31–35]. Dissolved inorganic nitrogen (DIN = ammonium +  
94 nitrate + nitrite) measurements on reefs are generally < 1.5  $\mu\text{M}$  (individual species ammonium,

95 nitrate, nitrite < 1  $\mu\text{M}$ ) with lower phosphate concentrations (< 0.3  $\mu\text{M}$ ; Table A2) [36–43]. A greater  
96 prevalence of disease has been associated with elevated concentrations of DIN from anthropogenic  
97 sources (i.e., fertilizer, sewage pollution, etc.) and phosphate ranging from 3.6  $\mu\text{M}$  to 25.6  $\mu\text{M}$  and 0.3  
98  $\mu\text{M}$  to 0.4  $\mu\text{M}$  respectively [36,37,41–43].

99 The isotopic signature of nutrients such as nitrogen can often act as a tracer for different sources  
100 of coastal pollution with different forms having different impacts (e.g., sewage can increase pathogen  
101 concentrations) and solutions [10,44–53]. Stable isotope analyses of nitrogen stored in macroalgae can  
102 provide a nutrient signal integrated over time versus water sampling, which is highly variable over  
103 space and time [54]. Generally,  $\delta^{15}\text{N}$  signatures in algae associated with urban wastewater are > 10‰  
104 [55–58]; however, values as low as 4.5‰ have been argued to be a result of anthropogenic sources of  
105 nutrients [47]. Depleted  $\delta^{15}\text{N}$  values (1–3.5‰) can be sourced from either synthetic fertilizers [55,57]  
106 or pristine mangroves [59]. Natural and synthetic fertilizers display a large range from -4‰–+4‰ of  
107  $\delta^{15}\text{N}$  values while nitrogen fixation typically has a negative  $\delta^{15}\text{N}$  signature between -2–0‰ [60].  
108 Upwelling can have variable  $\delta^{15}\text{N}$  values ranging from 5–12‰ [46,59,61–64]. Given the lack of  
109 inorganic fertilizer use and waste infrastructure in Timor-Leste, nearshore waters were expected to  
110 have  $\delta^{15}\text{N}$  signatures higher than upwelling (5–6‰) which is indicative of sewage pollution (> 10‰).  
111 Both fertilizer use and waste infrastructure are expected to be developed as described in the national  
112 strategic development plan [17].

#### 113 1.4 Global Impacts – ocean warming, mass coral bleaching, and mortality

114 The mass global bleaching event in 2016–2017 was the longest and most intense in history [21,65].  
115 This El Niño Southern Oscillation (ENSO) associated thermal event had global, but patchy impacts  
116 on coral reefs. Few reports exist of the impacts in the CT. The CT arguably, however, has the most to  
117 lose from the degradation of reefs [1]. NOAA’s Coral Reef Watch virtual station in Timor-Leste  
118 (CRWTL) reported anomalous warming between the two survey periods of November 2015 and July  
119 2017. Between January and May in 2016, and again from January and February 2017, the water  
120 temperature of the regions attained degree heating weeks (DHWs) above 4, but less than 8 [66]. A  
121 DHW range of 4 to 8 has been associated with 30–40% bleaching [67,68], suggesting that corals may  
122 have bleached twice within the 20-month sampling interval. Surviving corals, however, would have  
123 had four to five months to recover before resurveying in July 2017. Typically, mortality is not  
124 expected below DHW of 8 [69], although this is variable between species [70,71]. DHWs of or above  
125 8 were not attained in Timor-Leste during the experimental period. Corals that have experienced a  
126 recent thermal event that is sufficiently warm to cause temporary bleaching in some corals, may  
127 nonetheless be vulnerable to disease or other signs of compromised health [4,72,73]. Additionally,  
128 corals may endure sublethal effects for months after the event as they attempt to rebuild energy  
129 reserves [5,74]. During the 2017 bleaching event on the Great Barrier Reef, 48% of tabulate Acroporids  
130 were co-infected with White Syndrome (WS) and had seven times more tissue loss than only bleached  
131 colonies [75].

132 The aims of the present study were two-fold. The first was to investigate the state and health of  
133 coral reefs as measured by the presence of coral disease and other signs of compromised health. The  
134 second aim was to explore the impacts of humans on Timorese reefs through water quality  
135 measurements and surveys before and after the 2016-2017 global bleaching event. This was achieved  
136 through repeated coral health surveys, seawater nutrient and nitrogen stable isotope analyses of  
137 macroalgae to assess nutrients, and *in situ* and remotely sensed temperature data.

## 138 2. Materials and Methods

### 139 2.1 Study Site

140 Timor-Leste is a small country inside the southern edge of the CT and between Australia and  
141 Indonesia. The country gained its independence in 2002 following nearly 25 years of Indonesian  
142 occupation. It lies within the Indonesian ThroughFlow (ITF), a major oceanographic feature  
143 connecting the Pacific and Indian Oceans [76]

144 This study was undertaken along the coast of Dili, Timor-Leste to complement a growing body  
145 of coral reef science in the area. Previous indications of reef health in this area have typically been  
146 anecdotes from surveys with other objectives. Dili, the capital (8°33'S and 125°34'E), houses a quarter  
147 of the country's population with 252,884 people recorded in the 2015 Census [77]. The seasonal  
148 Comoro River runs through Dili, with flow ranging from less than 0.5 m<sup>3</sup>/s from July to November  
149 to 12.3 m<sup>3</sup>/s in March during the monsoon season from December to May [18,78]. The present study  
150 was conducted in two, three-week field trips that occurred in November of 2015 and July of 2017  
151 during the dry season. The dry season offers safer surveying conditions but would also limit  
152 terrestrial run-off inputs such as nutrients. While future studies should expand the results here by  
153 examining the dynamics of coastal systems during the wet season, it was not investigated here.

154 Surveys were conducted at four sites. Two sites flanked Dili and were representative of reefs  
155 under urban influences ("Urban-W" with 5,017.9 people/km<sup>2</sup>; "Urban-E" with 779.5 people/km<sup>2</sup>) and  
156 two sites were representative of reefs under rural influences ("Rural-N", and "Rural-E"; Figure 1).  
157 Sites were chosen for logistics and to complement US National Oceanic and Atmospheric  
158 Administration climate station data collection surveyed between 15–27<sup>th</sup> of November 2015 and 15–  
159 29<sup>th</sup> of July 2017 [79].

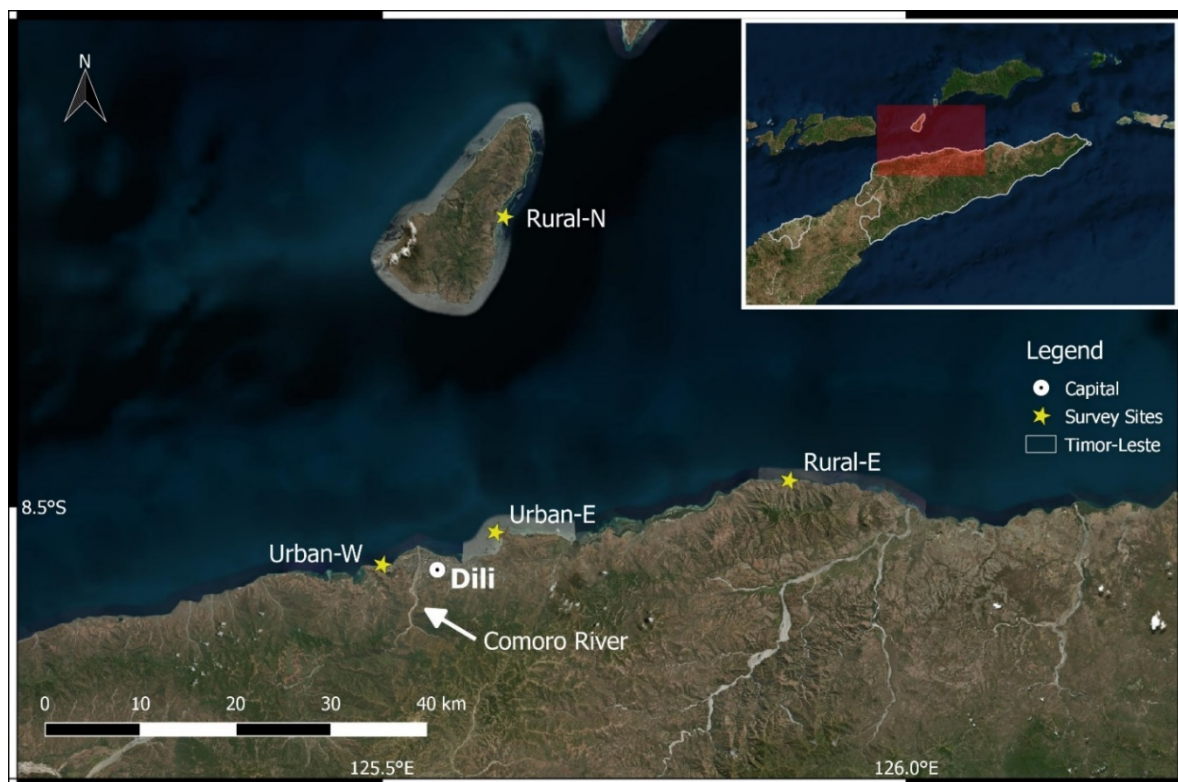

160

161 Figure 1 Survey sites in Timor-Leste around the capital of Dili. Rural-N on Ataúro Island in the  
162 channel, Rural-E 40 km east of Dili, and Urban-W and Urban-E flanking Dili. The highly seasonal  
163 Comoro river can be seen just east of Urban-W. The four sites were sampled at two-time points in  
164 November 2015 and June 2017. Jaco Island lies on the easternmost point of the country.

### 165 2.1 Coral community composition and coral health surveys

166 To assess benthic cover and coral health we deployed 15 m line intercept transects [80] and 15 m  
167 x 2 m belt transects [27]. At each of the four sites, three transects were laid at 5 m (reef flat) and 10 m  
168 (reef slope) depths for a total of 24 transects across all sites. The first transect at each site was chosen  
169 randomly with the subsequent transects at least 5 m away at the appropriate depth contour. For the  
170 line intercept transect, the benthos under the 15 m tape was categorized into a major benthic category  
171 (i.e., hard coral, soft coral, substrate/sand, macroalgae, turf algae, cyanobacteria, and crustose  
172 coralline algae-CCA). On the coral health belt transects, every coral colony within the belt transect



173 area was identified to genus and assessed visually for coral disease and signs of potential  
174 compromised coral health consisting of overgrowth by macroalgae, turf and cyanobacteria,  
175 encrusting invertebrates (sponges, tunicates, flatworm infestation), burrowing invertebrates (worms,  
176 barnacles), signs of predation ( fish and *Drupella sp.* snails), signs of bleaching (partial or total loss of  
177 algal symbionts appearing white), signs of coral response (pigmentation, mucus), and physical  
178 damage (sedimentation, breakage) as per protocols developed by the Global Environment Facility  
179 and World Bank Coral Disease Working Group (Figure 2; Figure A1; Table A3) [27]. Any uncertain  
180 diagnoses were photographed and used in later consultation. The prevalence of disease and  
181 compromised health was calculated as the number of corals affected by disease/compromised  
182 category divided by the total number of corals in the transect. The same transect start GPS coordinates  
183 at the surface were used for the second survey, in July 2017, with the same direction considering  
184 currents, etc.

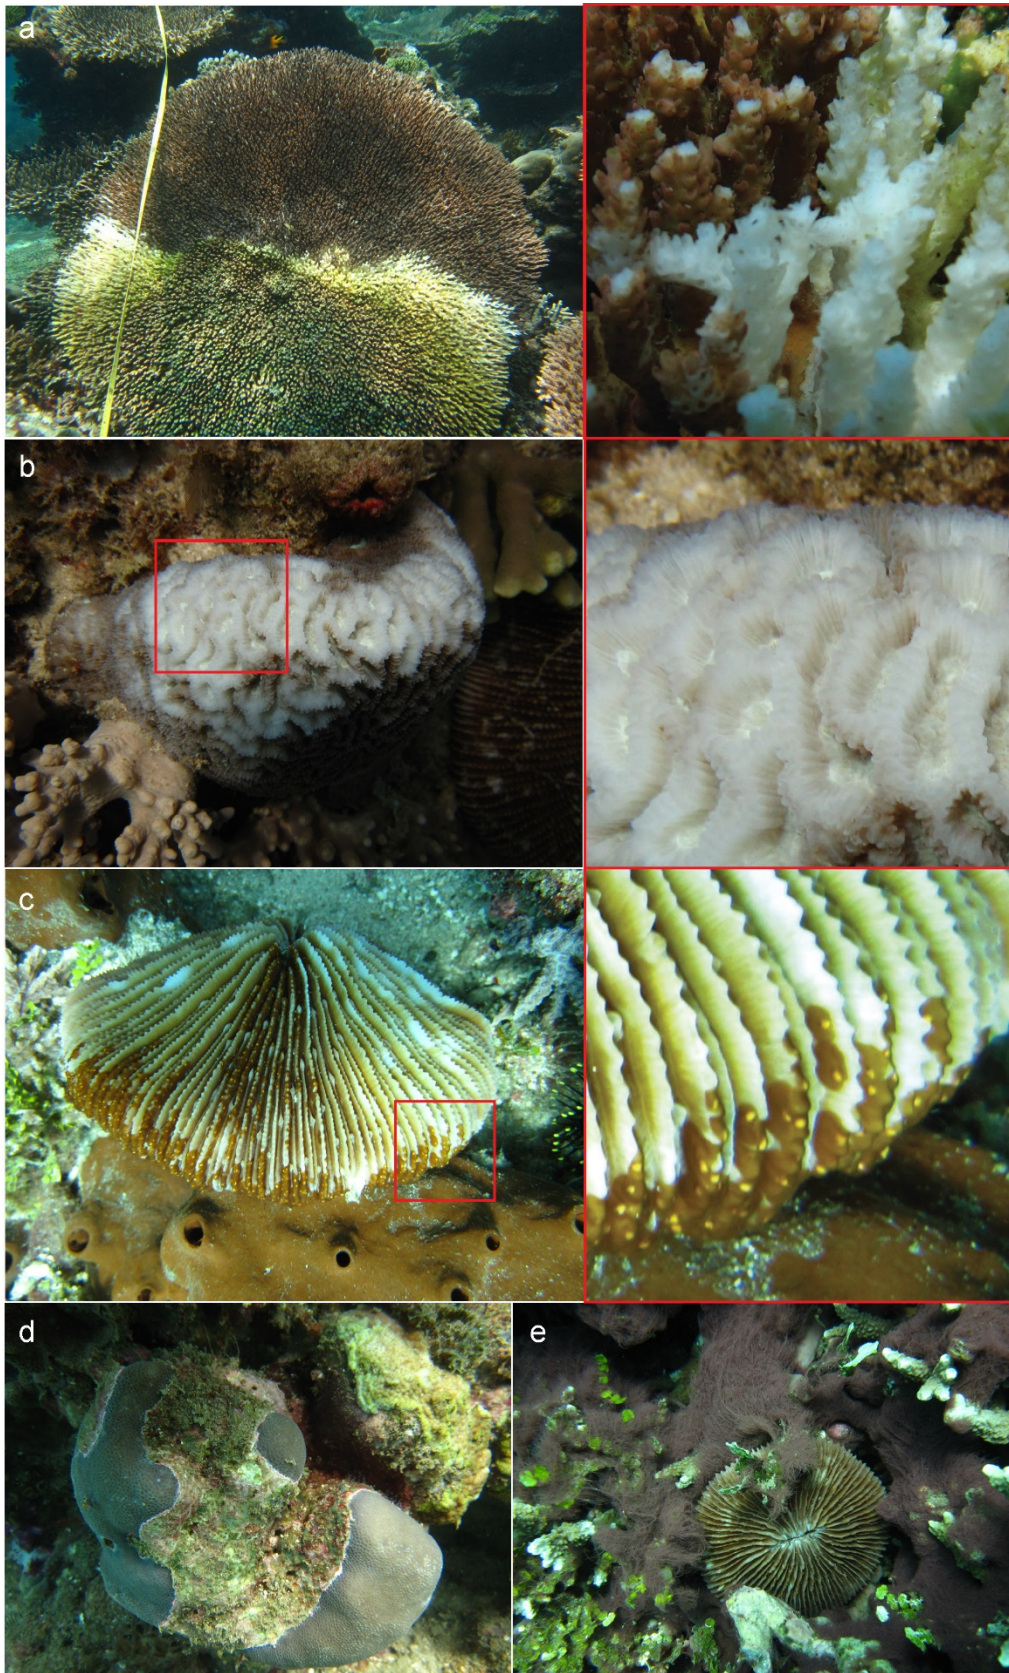

185

186

187

188

189

190

Figure 2 Examples of disease and compromised health observed during the surveys undertaken in Timor-Leste between November 15-27<sup>th</sup>, 2015. a) WS–White Syndrome band of distinct tissue loss on tabulate Acroporids with white skeleton abutting live tissue with exposed skeleton gradually colonized by turf algae, b) bleaching, c) flatworm infestation, and d) turf algae overgrowth. See Figure A1 for other compromised states and Table A3 for more information.



191 2.2 *Measurement of nutrient concentrations and stable isotope ratios*

192 Seawater samples were collected for measuring the concentration of inorganic nutrients as an  
193 indicator of nutrient pollution. Three replicate 100 ml seawater samples were collected on each  
194 transect 0.5 m above the benthos and kept on ice until filtering through a 0.22  $\mu\text{m}$  pore membrane  
195 filter and stored frozen. Seawater samples were analyzed within four months for ammonium, nitrite,  
196 nitrate, and phosphate using flow injection analysis at the Advanced Water Management Center (The  
197 University of Queensland). Nitrite had mostly zero values and was combined with nitrate for  
198 analyses.

199 Macroalgal samples were collected for stable isotope analysis to explore the origin of inorganic  
200 nitrogen. Three replicates of *Halimeda sp.* and *Chlorodesmis sp.* macroalgae (approximately 5 g dry  
201 weight) were collected when found on each transect, rinsed, and air-dried for transport. In the  
202 laboratory, the samples were re-dried at 60°C for a minimum of 24 h before homogenization using a  
203 mortar and pestle and analysis at the Cornell University Stable Isotope Laboratory (Finnigan MAT  
204 Delta Plus isotope ratio mass spectrometer) for  $\delta^{15}\text{N}$  analysis.

205 2.3 *In situ and satellite temperature data*

206 HOBO pendant temperature loggers (Onset Computer Corporation, Bourne, MA USA) were  
207 deployed at every site and depth in November 2015 recording temperature every 30 min. All were  
208 retrieved except those from Rural-E in June 2017. Remotely sensed satellite SST data from the  
209 NOAA's CRWTL was downloaded from August 2015 through August 2017. This product uses 5 km<sup>2</sup>  
210 resolution to predict bleaching stress across an entire jurisdiction such as Timor-Leste versus values  
211 at every pixel [66].

212 2.4 *Statistical analyses*

213 All analyses were conducted in R version 3.6.3 [81] and PRIMER7 [82,83]. Repeated measures  
214 permutational multivariate analysis of variance (PERMANOVA) with 9,999 permutations were  
215 conducted to test for significant effects between sites (Rural-N, Rural-E, Urban-W, Urban-E), depths  
216 (5 m, 10 m), and years (2015, 2017) on a Bray-Curtis similarity matrix of transformed benthic cover  
217 categories, transformed prevalence of disease and compromised health, and zero-adjusted,  
218 transformed Bray-Curtis similarity matrix of the number of colonies per coral genera (i.e., the count  
219 of coral genera per transect) [82,83]. All multivariate tests were also tested for homogeneity of  
220 dispersion akin to the homogeneity of variance in univariate tests [82]. Repeated measures analysis  
221 of variance (ANOVA in the *car*, *emmeans*, *nlme* R packages) [84–86] was used to test transformed hard  
222 coral, categories of disease and compromised health (bleaching–square root transformed), the  
223 transformed number of coral genera, and Shannon diversity index on transformed coral genera for  
224 significant effects between sites, depths, and years. Principal coordinates analysis (PCO) was run on  
225 the same transformed resemblance matrix of coral genera to visualize coral community structure. A  
226 repeated measures ANOVA was also conducted on the log-transformed number of Acroporids per  
227 transect between site, depth, and year. Normality was visually inspected (*hist*, *qqplot*, *qqnorm*,  
228 *leveneTest* in the *car* package) and all previous transformations were square root.

229 Nutrient data were only collected in 2015 and a two-way ANOVA with factors, site, and depth  
230 was performed on the seawater nutrient data including DIN (transformations: log–NH<sub>4</sub><sup>+</sup> and DIN,  
231 square root–NO<sub>3</sub><sup>-</sup> + NO<sub>2</sub><sup>-</sup>). A two-way ANOVAs (*Anova*) was used to test for significant differences in  
232  $\delta^{15}\text{N}$  for each of the two genera of algae, *Halimeda sp.* and *Chlorodesmis sp.*, with the factors site and  
233 depth. Only three samples of *Chlorodesmis sp.* were collected on a singular transect at Rural-E and  
234 were removed from the analysis. Variables were visually inspected for normality and tested for  
235 homogeneity of variance using Levene's test (*leveneTest*). Percent nitrogen was log-transformed for  
236 *Halimeda sp.* Posthoc tests were conducted (*multcomp* and *emmeans* R packages) for *Halimeda sp.* and  
237 *Chlorodesmis sp.* respectively [87]. The effect of 2015 nutrients on the same resemblance matrix of the  
238 prevalence of disease and compromised health of the same year was analyzed using a PERMANOVA

239 (9,999 permutations) with site and depth as factors and covariates  $\text{NH}_4^+$ ,  $\text{NO}_3^-$ , and  $\text{PO}_4^{3-}$  from the  
240 collected seawater data.

241 The monthly average from the moving seven-day average of the 24 hr daily maximum  
242 temperature of *in situ* temperature logger data and remotely sensed CRWTL data over the same time  
243 was calculated. ANOVAs were used to test for differences in site, depth, and month nested in year  
244 between monthly means of *in situ* temperature logger data and season and site between the average  
245 of CRWTL temperature over the study period and all logger sites over the following austral seasonal  
246 groupings: Jan–Mar (summer), Apr–Jun (fall), Jul–Sept (winter), Oct–Dec (spring). To assess levels of  
247 thermal stress, *in situ*, DHWs retrieved from CRWTL online [66].

### 248 3. Results

249 Benthic community composition and coral cover varied significantly between site, depth, and  
250 year and there was a trend of rural sites having more live coral; however, a greater number of sites  
251 are needed to draw this conclusion. The changes in benthic composition between surveys were  
252 attributed to heterogeneity versus coral mortality following the 2016–2017 global bleaching event.  
253 This was supported by the *in situ* temperature data collected between surveys which never surpassed  
254 maximum monthly mean (MMM) + 1°C to accumulate DHWs. Conversely, the CRWTL SST product  
255 accumulated 5.79 DHWs over the same time. The underlying coral community structure was  
256 significantly different at the four sites and significant differences in variability between and within  
257 sites contributed to this effect which can be a sign of varying levels of impact. There was a low  
258 prevalence of disease at the four sites surveyed in Timor-Leste which were not related to whether  
259 sites were urban versus rural. Contrary to our hypothesis, WS was the most prominent at Rural-N  
260 with a prevalence of  $0.9 \pm 0.2\%$  in 2015 while GAs was the most prevalent at Urban-W in 2017 ( $0.6 \pm$   
261  $0.3\%$ ). Lastly, seawater nutrients and  $\delta^{15}\text{N}$  were not significantly elevated at urban sites or  
262 consistently greater at 5 m depth versus 10 m. The prevalence of disease was significantly associated  
263 with phosphate concentrations as the highest combined nitrate and nitrite and phosphate were  
264 documented at Rural-N at 10 m, the site of highest disease prevalence.

#### 265 3.1 Coral cover and community composition at four sites

266 A total of 9,521 corals of 51 genera were counted over 720 m<sup>2</sup> of the surveyed area per year in  
267 2015 and 2017. The benthic composition was significantly different between the four sites. Rural sites  
268 had higher coral cover than the urban sites and the overall patterns of coral cover were consistent  
269 across survey years (Figure 3). Coral diversity also varied significantly; however, lower or higher  
270 genera diversity did not fall along rural versus urban distinctions. Urban-W at 10 m had low coral  
271 diversity while Rural-N was the only site dominated by tabulate and branching Acroporids and  
272 consistently high (> 40%) coral cover over survey years.



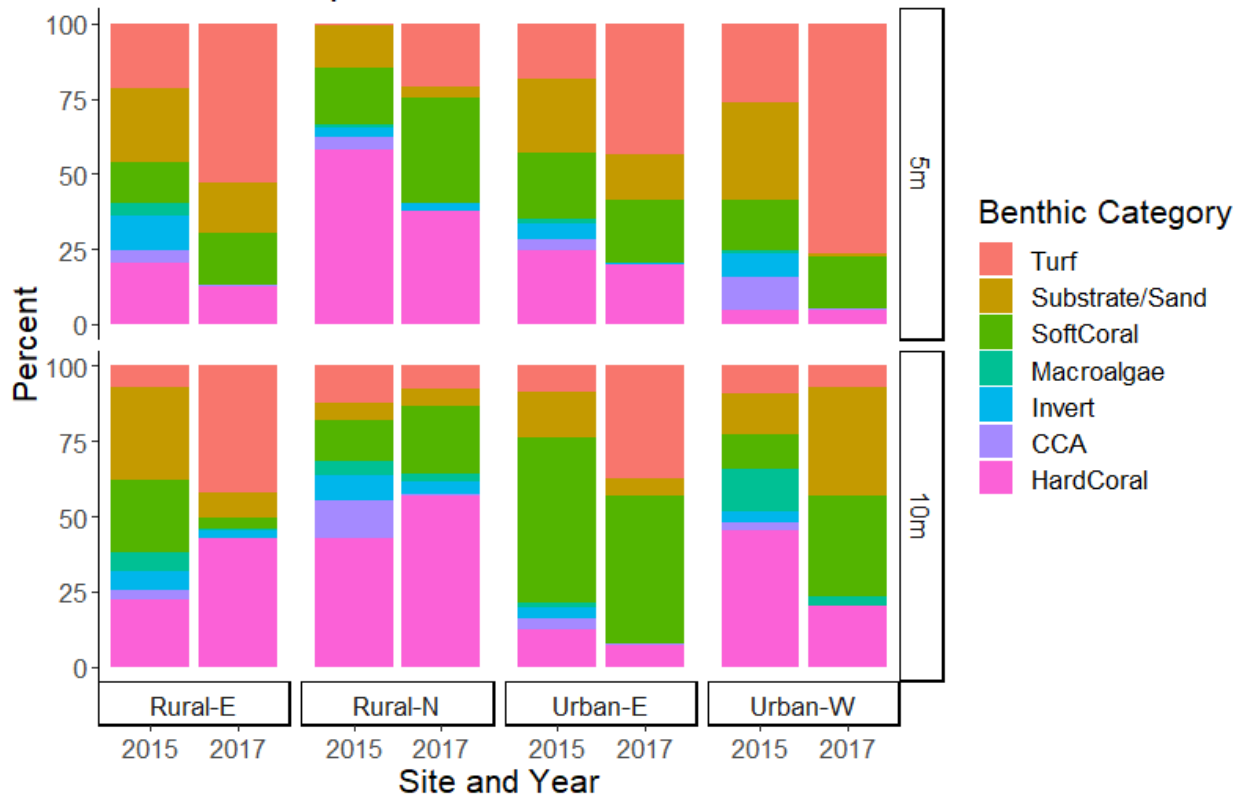

273

274

275

276

Figure 3 Benthic composition cover from 15 x 2 m line intercept transects by site and depth for 2015 and 2017 survey periods in Timor-Leste. Major categories include Hard Coral, CCA—crustose coralline algae, Invert-mobile invertebrates, Macroalgae, Soft Coral, Substrate/Sand, Turf Algae.

277

278

279

280

281

282

283

284

285

286

Benthic composition varied spatially with a significant site and depth interaction (repeated measures PERMANOVA, pseudo- $F(3,47) = 4.5117$ ,  $p(\text{perm}) = 0.0041$ ) and temporally by year (pseudo- $F(1,47) = 34.0270$ ,  $p(\text{perm}) = 0.0002$ ). At 5 m depth, Rural-E had comparable benthic composition to both urban sites but was only similar to Urban-W at 10 m ( $p > 0.05$ ). Urban-W was the only site that varied significantly between depths ( $p < 0.05$ ). Coral cover was significantly different with a three-way interaction (repeated measures ANOVA  $\chi^2(3,16) = 13.6947$ ,  $p = 0.0034$ ). Urban-W at 5 m had the lowest coral cover in both years (mean  $\pm$  SE;  $4.8 \pm 1.8\%$  in 2015 and  $4.5 \pm 1.5\%$  in 2017) and Rural-N 5 m ( $58.2 \pm 1.7\%$ ) and Rural-N 10 m ( $56.9 \pm 3.3\%$ ) had the highest live coral cover respectively in 2015 and 2017 (Figure 5). Overall, hard coral cover was higher at rural sites ( $37.3 \pm 5.3\%$ ) than urban sites ( $12.9 \pm 3.8\%$ ).

287

288

289

290

291

292

293

Although 51 genera were found across the four sites, few genera dominated the reef, namely *Porites* (2015 = 17.4%, 2017 = 13.0%, *Fungia* (2015 = 13.7%, 2017 = 19.0%), and *Montipora* (2015 = 12.9%, 2017 = 13.4%). The maximum genera richness of  $33 \pm 2$  was present at Rural-N and minimum at Urban-W at 10 m with  $18 \pm 2$  genera. The Shannon diversity index showed site and depth differences (three-way repeated measures ANOVA  $\chi^2(3,16) = 24.3377$ ,  $p < 0.0001$ ) with Urban-W 10 m ( $1.7 \pm 0.2$ ) driving this interaction (Figure A2). The coral diversity was similar across rural and urban sites except for Urban-W at 10 m.

294

295

296

297

298

299

300

301

Coral diversity, as measured by the abundance of individual coral genera, also differed significantly by a site and depth interaction which was driven by site-level distinctions versus rural and urban boundaries (repeated measures PERMANOVA pseudo- $F(3,47) = 3.3011$ ,  $p(\text{perm}) = 0.0018$ ). Diversity at Urban-E was significantly different from all other sites ( $p < 0.05$ ) at 5 m and all sites were significantly different at 10 m ( $p < 0.05$ ). Rural-E and Urban-W were significantly different within sites between depths ( $p < 0.05$ ). Sites were generally distributed along axis two of the PCO with Rural-N most positively associated with tabulate Acroporids, *Galaxea*, *Goniastrea*, *Montipora*, and *Stylophora* genera, while 5 m transects were aligned along axis one with more *Pocillopora*, *Platygyra*, and massive

302 *Porites* corals (Figure 4). Dispersion, or variability within the coral genera, was also significantly  
303 different for the site and depth interaction ( $F = 10.638$ ,  $p(\text{perm}) = 0.0001$ ) indicating that variability  
304 within sites and depths contributed to significant differences in addition to abundances of coral  
305 genera. Specifically, the dispersion was significantly lower at Rural-N compared to Urban-E and  
306 Urban-W at 10 m and greater at Urban-W 10 m compared to the same site at 5 m, Urban-E 10 m, and  
307 Rural-E 10 m ( $p < 0.05$ ). Site dispersion, or spread of site markers, increases moving down PCO axis  
308 two and is generally less at 5 m (open symbols) than at 10 m (solid symbols; Figure 4).

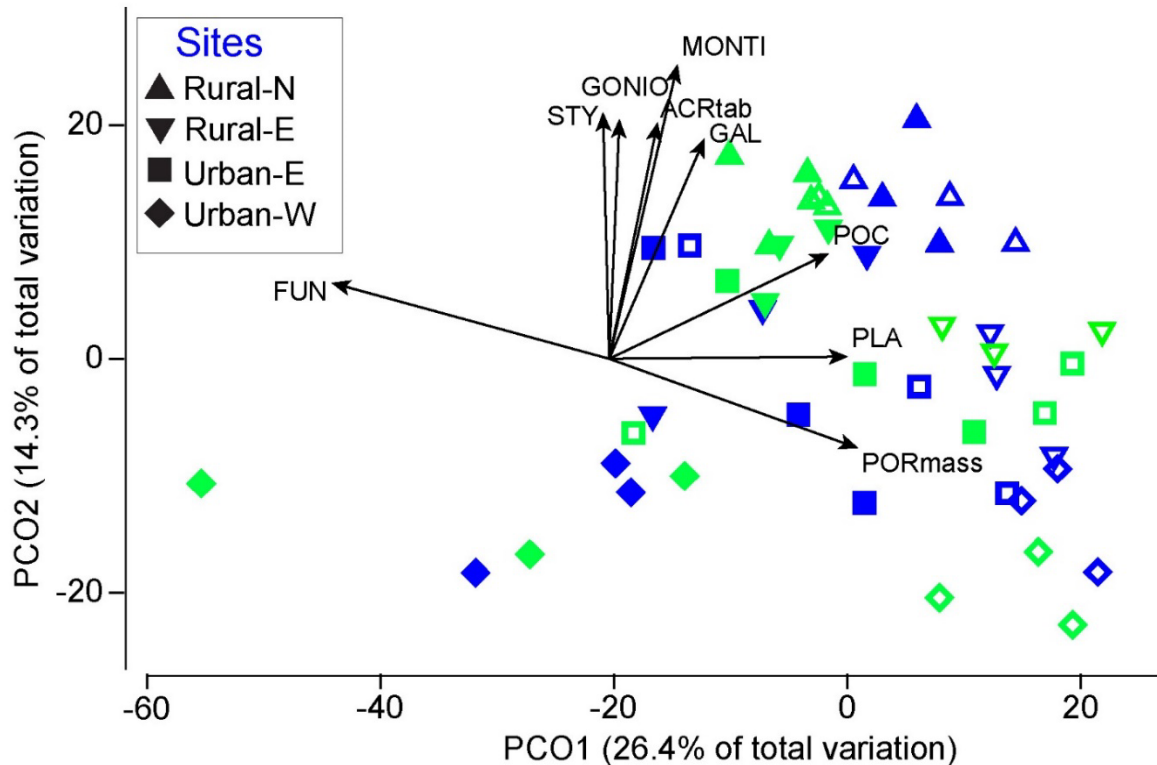

309

310 Figure 4 Principal Coordinates Analysis biplot of coral genera diversity. Shapes indicate site with  
311 empty and solid markers indicating 5 and 10 m depths respectively. Color indicates survey year: blue–  
312 2015 and green–2017. Abbreviations are coral abundances as follows: ACRtab–Acropora tabulate,  
313 FUN–Fungiids, GAL–Galaxea, MONTI–Montipora, GONIO–Goniastrea, PLA–Platygyra, POC–  
314 Pocillopora, PORmass–Porites massive, and STY–Stylophora.

315 There was also a significant site and year interaction for coral community structure (repeated  
316 measures PERMANOVA pseudo- $F(3,47) = 2.1432$ ,  $p(\text{perm}) = 0.0071$ ). Coral diversity between Rural-  
317 N and all other sites and Urban-W and Rural-E were significantly different in both years ( $p < 0.05$ )  
318 and differences in dispersion were also significant where Rural-N and Urban-W had the least and  
319 most variability respectively. Dispersion at these sites was significantly different from all other sites  
320 for both in years in the case of Rural-N and 2015 for Urban-W (Figure 4).

321 Community composition varied significantly between sites with sites invariably having  
322 different dominant genera. While rural sites had more coral cover overall, coral community  
323 composition was distinct between sites at differing levels between depths. Urban sites did have low  
324 coral cover ( $< 10\%$ ) at either 5 or 10 m consistently between years (Figure 3). Additionally, Urban-W  
325 had the lowest coral diversity at 10 m (Figure A2). Rural-N stood out with the highest coral cover,  
326 the greatest number of genera, and the largest proportion of tabulate and branching Acroporids. At  
327 both depths, Rural-N had significantly more tabulate (repeated measures ANOVA  $\chi^2(3, 20) = 88.7746$ ,  
328  $p < 0.0001$ ) and branching Acroporid colonies (repeated measures ANOVA  $\chi^2(3, 20) = 38.3591$ ,  $p <$   
329  $0.0001$ ) than all other sites with  $21.1 \pm 0.7$  and  $11.0 \pm 0.4$  colonies per transect respectively ( $p < 0.05$ ).  
330 All other sites averaged less than five Acroporid colonies per transect for both morphologies.

331 3.2 Prevalence of coral disease and indicators of compromised health

332 Overall, the majority of hard corals at sites surveyed appeared healthy. Those categorized as  
333 “healthy” made up  $65.7 \pm 1.70\%$  of corals surveyed averaged over both years with low ( $< 1\%$ )  
334 prevalence of diseases. There were no clear distinctions between rural and urban sites. In 2015, there  
335 was  $0.9 \pm 0.2\%$  prevalence of WS at Rural-N with  $61.9\%$  of total disease found on *Acropora sp.* Rural-  
336 N also had the highest prevalence of GAs the same year with  $0.6 \pm 0.2\%$ . There was one case of  
337 unconfirmed Trematodiasis, which requires microscopic confirmation of the larval trematode.  
338 Disease prevalence was lower in 2017 with the highest prevalence of WS at Rural-N again ( $0.5 \pm 0.1\%$ )  
339 but, Urban-W had the most GAs ( $0.6 \pm 0.3\%$ ). All cases of WS were documented on Acroporids in  
340 2017 while GAs were less host-specific found on nine genera across both years. The prevalence of  
341 compromised health was much higher than diseases with an average of  $37.4 \pm 3.9\%$  across sites and  
342 years (Figure 5).

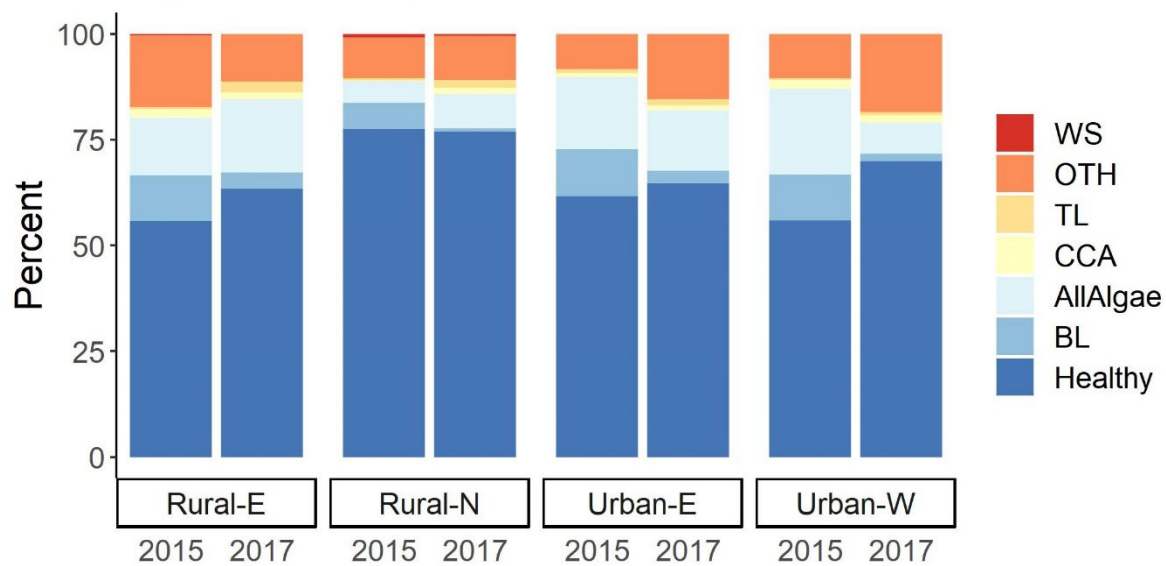

343

344 Figure 5 Prevalence of disease and indicator of compromised coral health from 15 x 2 m belt transect  
345 surveys at four sites in Timor-Leste from November 15-27<sup>th</sup>, 2015 and June 15-29<sup>th</sup>, 2017. AllAlgae-  
346 combined macroalgae, turf, and cyanobacteria overgrowth; BL-Bleaching; CCA-Crustose coralline  
347 algae overgrowth; OTH-combined pigmentation, predation, invertebrate infestation/overgrowth,  
348 burrowing invertebrates; TL-Unexplained tissue loss; and WS-White Syndrome.

349 Prevalence of disease and compromised health categories varied significantly by year and site  
350 (repeated measures PERMANOVA, pseudo-F(3,47) = 3.7611; p = 0.0042) and site and depth  
351 interactions (pseudo-F(3,47) = 4.4228; p = 0.0094). Rural-N had the lowest prevalence of disease and  
352 compromised health compared to all sites in 2015 ( $22.43 \pm 0.92\%$ ) and 2017 ( $33.84 \pm 4.25\%$ ; p(perm) <  
353 0.05). However, Rural-N was the only site where the prevalence of compromised health and disease  
354 increased between survey years. Despite this, Rural-N was characterized by the highest percentage  
355 of healthy corals ( $78.0 \pm 0.9\%$ ), significantly higher than all other sites in 2015 but not significantly  
356 lower in 2017 ( $61.7 \pm 4.7\%$ ; three-way ANOVA  $\chi^2(3,16) = 12.5135$ , p = 0.006; p < 0.05). This site also had  
357 the lowest prevalence of algal overgrowth on corals in 2015 ( $5.3 \pm 1.2\%$ ) significantly lower than  
358 Urban-W in the same year ( $20.3 \pm 1.8\%$ ;  $\chi^2(3,36) = 58.42713$ , p < 0.001) and the lowest amount of  
359 bleaching both years ( $6.0 \pm 0.9\%$  in 2015,  $0.8 \pm 0.2\%$ ; Table A4).

360 3.3 Water quality

361 3.3.1 Nutrients and stable isotopes

362 Seawater nutrient levels and N stable isotopes of macroalgae were simultaneously assessed to  
363 get an indication of land-based pollution. Nutrients were not elevated at the urban sites where



364 sewage pollution can result in  $> 10 \mu\text{M}$  DIN although there were significant site and depth  
365 interactions (two-way MANOVA  $F(3,63) = 3.208$ , Pillai = 0.398,  $p = 0.0012$ ). Nitrate, nitrite, and  
366 phosphate were responsible for these interactions (two-way ANOVA  $\text{NO}_3^- + \text{NO}_2^-$ :  $F(3,63) = 10.899$ ,  $p$   
367  $< 0.001$ ;  $\text{PO}_4^{3-}$ :  $F(3,63) = 4.560$ ,  $p = 0.006$ ). Rural-N 10 m had significantly higher combined nitrate and  
368 nitrite ( $\text{NO}_3^- + \text{NO}_2^-$ :  $1.05 \pm 0.07 \mu\text{M}$ ) and phosphate ( $\text{PO}_4^{3-}$ :  $0.15 \pm 0.01 \mu\text{M}$ ; Table A5), than all other  
369 sites at 10 m, but comparable levels of both at 5 m (Figure 8). DIN was marginally significant with a  
370 site and depth interaction (two-way ANOVA  $F(3,63) = 2.777$ ,  $p = 0.0484$ ), but pairwise test showed no  
371 significant comparisons ( $p < 0.05$ ; Figure 6).

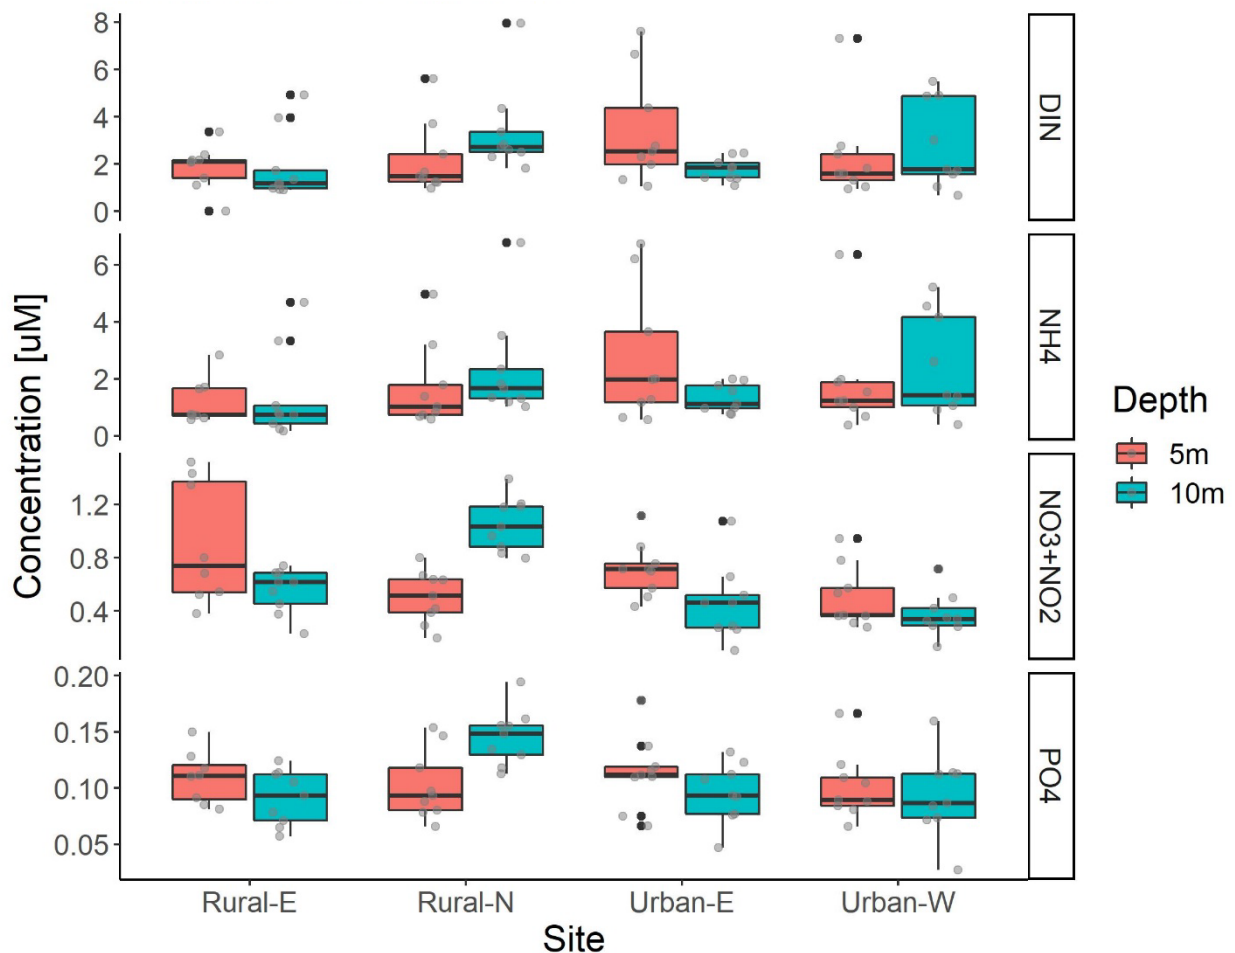

372

373 Figure 6 Seawater nutrient concentrations (top to bottom: DIN,  $\text{NH}_4^+$ ,  $\text{NO}_3^- + \text{NO}_2^-$ ,  $\text{PO}_4^{3-}$ ) sampled in  
374 triplicate at four sites (Urban-W, Urban-E, Rural-N, Rural-E), two depths (5 m and 10 m), and three  
375 transects per depth in Timor-Leste in 2015. Bold line is the median, box ends are the first and third  
376 quartile, lines are 95% confidence interval of the median, and points are Tukey's outliers.

377 Stable isotope values were remarkably consistent across sites, with no elevated levels at the  
378 urban sites compared to the rural sites. Delta  $^{15}\text{N}$  stable isotopes had a significant site difference for  
379 both algae species. Urban-E had significantly lower  $\delta^{15}\text{N}$  for both algae species (Table 2).

380

381 Table 1 Delta <sup>15</sup>N stable isotope ANOVA results of two genera of algae sampled in replicates at the  
 382 four sites (Urban-W, Urban-E, Rural-N, Rural-E), two depths (5 m and 10 m), and three transects per  
 383 depth in Timor-Leste in 2015. Bolded values are significant results with mean, SE, and posthoc  
 384 groupings presented per site. No *Chlorodesmis* sp. was sampled at Rural-N or Rural-E at 10 m and the  
 385 three samples collected from a single transect at Rural-E 5 m were removed for the ANOVAs. N%  
 386 and C:N ratio values and statistics are presented in Table A6.

| Algae            | Effect       | df | F-value | p-value | Rural-E | Rural-N | Urban-E | Urban-W |
|------------------|--------------|----|---------|---------|---------|---------|---------|---------|
| Halimeda sp.     | Site         | 3  | 3.8199  | 0.0121* | 4.26‰   | 4.31‰   | 4.03‰   | 4.26‰   |
|                  | Depth        | 1  | 0.5442  | 0.4624  | ±0.01   | ±0.01   | ±0.01   | ±0.01   |
|                  | Site x Depth | 3  | 1.3801  | 0.2531  | ab      | b       | a       | b       |
| Chlorodesmis sp. | Site         | 1  | 10.0028 | 0.0064* | 4.57‰   | -       | 4.11‰   | 4.47‰   |
|                  | Depth        | 1  | 0.1747  | 0.6819  | ±0.09   |         | ±0.02   | ±0.04   |
|                  | Site x Depth | 1  | 2.4127  | 0.1412  |         |         | a       | b       |

387

388 Testing the drivers of prevalence of disease and compromised health with seawater nutrient  
 389 concentrations in 2015, they differed significantly between site (p(perm) = 0.0001), depth (p(perm) =  
 390 0.0016), and PO<sub>4</sub><sup>3-</sup> (p(perm) = 0.0162; Table A7). The dispersion, or variability, grouped by site and  
 391 depth was significantly different (one-way ANOVA F(7,16) = 5.931, p < 0.01) and dispersion was  
 392 greatest at Rural-N and significantly larger than all other sites at 10 m and Urban-E and Rural-E at 5  
 393 m (p < 0.05). Phosphate was significantly higher at Rural-N 10 m compared to other sites at the same  
 394 depth (Figure 6) and Rural-N had the highest prevalence of WS (Figure 5).

### 395 3.4 Temperature and the prevalence of bleaching

396 The *in situ* logger temperature data was significantly different by a site and depth interaction  
 397 (three-way ANOVA: F(2, 85) = 5.7503, p = 0.0045) and month nested in year (three-way ANOVA: F(15,  
 398 85) = 175.2521, p < 0.0001). Urban-E (29.37 ± 0.17°C) was not significantly different from the other two  
 399 sites at 10 m and Rural-N (28.98 ± 0.17°C) and Urban-W (28.99 ± 0.17°C) were not significantly  
 400 different at 5 m (p < 0.05). Additionally, mean monthly temperatures in 2016 were higher than the  
 401 corresponding months in 2015 and 2017 in the six months where overlap occurred (Figure 7).  
 402 Comparison of the monthly mean of all *in situ* loggers and CRWTL monthly temperature mean was  
 403 significantly different by a season and site interaction (two-way ANOVA: F(3,53) = 3.92, p = 0.0100).  
 404 The CRWTL 5 km satellite-derived SST was significantly higher than the *in situ* logger data during  
 405 the austral summer (Jan–Mar, CRWTL = 30.67 ± 0.47°C, logger = 29.08 ± 0.50 °C).

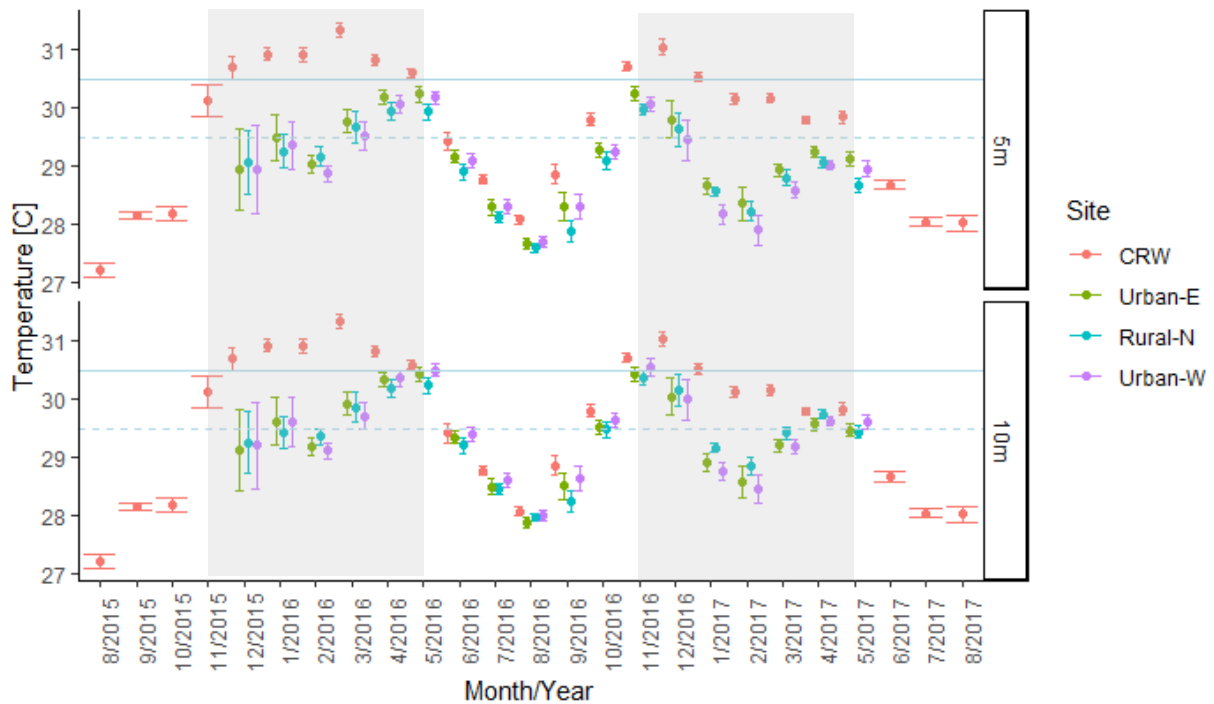

406

407 Figure 7 Mean temperature by month  $\pm$  2SE for remotely sensed sea surface temperature from Coral  
408 Reef Watch (CRW) and in situ temperature loggers (Rural-N, Urban-E, Urban-W at 5 and 10 m depth)  
409 between sampling periods in 2015 and 2017. The dashed blue line is the maximum monthly mean  
410 (MMM) from CRW data and the solid blue line is MMM + 1°C, the bleaching threshold.

411 A major heat stress event occurred between surveys in November 2015 and July 2017 (639 days).  
412 CRWTL indicated there was 190 days (30.2%) of bleaching warning ( $0 < \text{DHW} < 4$ ) and 161 days  
413 (25.2%) at bleaching alert 1 ( $4 \leq \text{DHW} < 8$ ). The accumulation of DHWs was limited to November  
414 29<sup>th</sup>, 2015–July 12<sup>th</sup> of 2016 (224 days) and November 13<sup>th</sup>, 2016 through March 16<sup>th</sup>, 2017 (119 days)  
415 which corresponds to the months where the CRWTL monthly averaged temperatures were greater  
416 than the MMM (Figure 7). The accumulation of DHWs between 2015–2016 was almost 8 months,  
417 twice as long as the DHW accumulation from 2016–2017. The *in situ* temperature data, however,  
418 never reaches the MMM + 1°C threshold for bleaching, and based on these data there would be no  
419 accumulation of DHWs.

420 There was a three-way interaction between site, depth, and year on bleaching prevalence  
421 (repeated measures ANOVA,  $\chi^2 = 18.6709$ ,  $p = 0.03$ ;  $p < 0.05$ ; Figure 5). All sites at the same depth  
422 showed a decrease in the prevalence of coral bleaching between surveys, which is expected as the  
423 second survey was conducted at the onset of austral winter. However, only Rural-E at 10 m ( $13.4 \pm$   
424  $0.7\%$  and  $2.8 \pm .3\%$  in 2015 and 2017 respectively) and Urban-W at 5 m ( $17.4 \pm .6\%$  and  $1.8 \pm 1.3\%$ ) had  
425 significant decreases. Rural-N in 2017 ( $1.1 \pm .5\%$ ) had significantly less bleaching than all other sites  
426 other than Urban-E ( $3.3 \pm 1.3\%$ ;  $p < 0.05$ ). Paling also occurs with seasonal swings and  
427 photoacclimatory changes in symbiont density can be difficult to differentiate with bleaching in  
428 corals [89].

#### 429 4. Discussion

430 In this study, we produced a baseline for the condition of four outer reef slope communities at  
431 rural and urban sites near the capital Dili, in Timor-Leste. A higher prevalence of coral disease and  
432 other signs of compromised health was expected at urban sites with elevated nutrients from sewage  
433 pollution. Our study reports major differences between sites in terms of community composition,  
434 disease prevalence, and potential exposure to local threats, but disease prevalence was low overall  
435 and nutrient levels were consistent across sites. Insights and answers were derived for two key



436 questions posed at the outset of this study. Firstly, there is evidence of human subsistence activities  
437 influencing the health of a reef at one of the urban sites and second, Timorese reefs were subjected to  
438 bleaching during the 2016 global bleaching with the accumulation of >4 DHWs. This, however, was  
439 not supported by the *in situ* temperature logger data. Whilst recording similar temperatures in cooler  
440 months to that observed by satellite average for the region, the loggers recorded significantly lower  
441 temperatures over the summer months, never reaching the MMM + 1°C threshold associated with  
442 bleaching. Mortality associated with the event was low by comparison to regions that experienced >  
443 8 DHW during the bleaching event and high coral mortality.

#### 444 4.1 Coral community composition and human impacts

445 The underlying coral community composition was different across the four surveyed sites,  
446 which influenced the prevalence of coral disease. Rural-N had the highest coral cover and diversity  
447 dominated by Acroporids which is comparable to the biodiversity assessment of the same site in the  
448 2012 Rapid Marine Assessment [90]. While damage to reefs may correlate with the local population  
449 density of humans [91–94], rural sites in the present study did not have a lower prevalence of coral  
450 disease. Although not definitive, there is some evidence suggesting the rural sites are in better shape  
451 in terms of coral cover than the urban sites. However, the marked presence of Acroporids at Rural-  
452 N seems to indicate that this reef is distinctive from the remaining sites versus clear rural and urban  
453 distinctions. Rural-N was the only barrier reef survey which are uncommon along the north coast  
454 and harder to access. It was anecdotally observed, that site-specific factors, such as ease of access to  
455 the reef, were associated with reduced reef health in terms of reduced coral cover, coral diversity,  
456 and other signs of compromised health.

457 Significant differences were identified between the state of coral reefs between Rural-N and the  
458 three mainland sites (Urban-W, Urban-E, and Rural-E). Localized impacts along the northern coast  
459 of Timor-Leste include watershed-based pollution and fishing and gleaning [15,20,95,96]. Geography,  
460 season, and factors such as land-use, accumulated wave exposure, and storm exposure are likely to  
461 be important but were not studied here. However, Rural-N may be subjected to less sedimentation  
462 than the other three sites, as Ataúro Island does not have any major rivers as on Timor island. Dili  
463 (encompassing Urban-E and Urban-W) and Rural-E in Manatuto are both near major rivers (the  
464 Comoro and Laço rivers respectively). Large storms and waves are uncommon along the north coast.  
465 Temperature likely has a negligible influence on community composition as the temperature logger  
466 data was consistent between the three sites where loggers were successfully retrieved, Rural-N,  
467 Rural-E, and Urban-W (Figure 7). This leads us to localized human impacts as a key source of impact  
468 on coral reefs.

469 Fishing is playing an increasingly significant role in Timor-Leste. Observations of extensive  
470 rubble slopes at Urban-W may be due to blast fishing although the damage does not appear to be  
471 recent [90]. Gleaning is largely overlooked when assessing fisheries in Southeast Asia although most  
472 (> 80%) of households in coastal communities participate in gleaning activities in Timor-Leste [97,98].  
473 Women and children glean while men fish, however, gleaners have nearly a 100% success rate  
474 highlighting its importance in maintaining food security especially during low crop periods [97,99].  
475 Increased gleaning could also be a sign of diminishing fishing returns [100] or economic crises [101].  
476 Gleaning may have played an even greater role in food security during recent times of violence and  
477 instability resulting in degraded coral reef flats, particularly in densely populated areas. Human  
478 gleaning and the associated trampling of intertidal reefs have been demonstrated to have deleterious  
479 effects on coral cover on reef flats although depths greater than 5 m are generally out of reach  
480 [15,102,103].

481 Urban-W site had more fishing activity than the other sites from observations while conducting  
482 fieldwork and also had the greatest signs of blast fishing. The subdistrict of Dom Alexio  
483 encompassing this site had the highest population density out of the four sites with 5,017.9  
484 people/km<sup>2</sup> compared to 779.5 people/km<sup>2</sup> at Urban-E and 79.3 people/km<sup>2</sup> nationally. The low coral  
485 cover at 5 m and the minimal diversity at 10 m could be attributed to the high subsistence and  
486 recreational usage at this site. Women were gleaning for invertebrates on the low tide, small children

487 were playing in the surf and on the reef flat, and men were net-fishing from small boats (Figure A3).  
488 While distance to river is a sensible explanation between community-level differences between Rural-  
489 N and Rural-E, relative ease of access in a densely populated area differentiated Urban-W. Urban-W  
490 is in walking distance to a densely populated area with fishing boats lining the beach while Urban-E  
491 is tucked in at the edge of Dili Bay surrounded by steep hills and more affluent neighborhoods.

#### 492 4.2 *The health of coral reefs along the north coast of Timor-Leste*

493 Prevalence of disease and compromised coral health was expected to be greatest at urban sites  
494 with larger nutrient input and greater  $\delta^{15}\text{N}$  values at the shallow 5 m surveys. Contrary to  
495 expectations, disease was highest at Rural-N at 5 m with levels of WS at ~1% in both survey years.  
496 Combined nitrate and nitrite, and phosphate levels were also highest at Rural-N, but at 10 m. The  
497 low levels of disease detected in the current study agree with previous surveys [90,104], although no  
498 previous studies were specifically quantifying disease and compromised health.

499 WS was the main pathology consistently observed during surveys. The WS documented at  
500 Rural-N was likely an infectious disease [25] and in the Indo-Pacific, WS is known to target  
501 Acroporids [7,25,105]. Direct transmission of WS spreading between Acroporid corals was observed  
502 in the field, in addition to a positive association between host abundance and disease prevalence.  
503 This follows the classic density dependent host pathogen relationship [90-92], a phenomenon which  
504 has been demonstrated in coral disease ecology. In this study, all but one case of WS was on  
505 Acroporids. In 2015, 13 of the 17 recorded cases were at Rural-N, while in 2017 all 10 cases were  
506 documented at Rural-N which had the highest density of Acroporids [7,23,106,107]. The few cases at  
507 other sites could have been from other causes such as unidentified predation; however, there was  
508 sufficient evidence to suggest that WS at Rural-N was caused by an infectious pathogen.

509 There was likely coral mortality caused by the WS, inferred from the proportion of dead coral  
510 on some colonies (Figure 2a) as is typical with WS progression on Acroporids [108,109]. While a low  
511 prevalence of WS was at Rural-N 5m it is likely not responsible for the decrease in coral cover.  
512 Prevalence of WS did not differ between depths (Figure 5), and there was an increase in coral cover  
513 at Rural-N 10 m. WS recorded here is likely typical background levels of disease comparable to other  
514 CT locations versus an outbreak although the prevalence of WS should continue to be monitored  
515 [107,110-113]. The low prevalence of coral disease in the CT supports the disease-diversity hypothesis  
516 which predicts that higher host species diversity should result in decreased severity of a specialist  
517 pathogen through increasing interspecific competition [114-116]. The majority (> 50%) of cases were  
518 on tabulate Acroporids and the most susceptible as documented on other Pacific reefs to WS out of  
519 four morphologies (likely different species) identified during surveys [114].

520 WS is a dynamic disease and can occur in outbreaks devastating Acroporid populations [25,117]  
521 and thus alter overall coral community structure [117]. The pathogen causing WS at Rural-N is  
522 unknown but was likely a *Vibrio spp.* bacteria that have been associated with diseases of multiple  
523 marine organisms including corals and humans [118-121]. These bacteria have previously been  
524 implicated as a causative agent of WS [122-124]. The causes of WS outbreaks have been linked to  
525 sediment plumes from dredging and terrestrial runoff and elevated ocean temperature [7,8,125,126].  
526 This is especially relevant given the recent global bleaching event and expected increase in the  
527 prevalence and severity of marine diseases given continued ocean warming [127]. A significant  
528 relationship between WS and coral bleaching co-infection was found on the GBR during the 2016-  
529 2017 global bleaching event. *Acropora* colonies that exhibited both WS and bleaching had seven times  
530 more tissue loss than solely bleached colonies [75]. Cooler temperatures could be a protective factor  
531 against outbreaks of WS in Timor-Leste given the cooler subsurface temperatures on reefs compared  
532 to SST during the monsoon season which coincides with the yearly ocean temperature maximum.  
533 Increased sedimentation from catchments, however, is a continued threat as watershed health in  
534 Timor-Leste is poor and there is a need for future work assessing impacts of sedimentation on reefs  
535 and coral health.

536 The prevalence of indicators of compromised health was much greater than the prevalence of  
537 disease at surveyed sites. Rural-N at 5 m had the highest prevalence of non-coral invertebrate

538 overgrowth (Figure 5), which could be explained by greater coral cover eliciting more coral-  
539 invertebrate interactions as the cover of invertebrates is comparable between all sites. The infestation  
540 of flatworms was found at all sites except Urban-W 10 m with similar prevalence as surveys in  
541 Indonesia [107] with some severe cases (Figure 2c). Flatworms consume coral mucus, reduce  
542 heterotrophic feeding, and decrease photosynthesis in high densities [128–130] although their role in  
543 coral reef environments is not well understood. There was also a notable absence of turf overgrowth  
544 at Rural-N while the remaining sites have high levels which could be indicative of depauperate  
545 herbivore communities or elevated nutrients at these locations [131,132]. Different competitive  
546 interactions such as burrowing barnacles, CCA overgrowth, and turf overgrowth were also more  
547 commonly found on genera with specific morphologies significantly associated with *Platygyra*,  
548 *Montastrea*, and massive *Porites*, all massive species. The highest cyanobacteria overgrowth was  
549 found at Rural-W at 10 m which was most closely associated with branching Montiporids and  
550 Poritids.

#### 551 4.3 Water quality and sources of nutrients in Timor-Leste

552 The nutrient concentrations plus stable isotope ratios were more indicative of oceanic processes  
553 (i.e., upwelling, internal waves, etc.) versus terrestrially based nutrient pollution. Phosphate was a  
554 significant driver of the prevalence of disease and compromised health (Table A7) and the highest  
555 values of each parameter were both at Rural-N which suggests that increased phosphate is associated  
556 with a higher prevalence of disease (Figure 6; Figure 5). High levels of inorganic nutrients are a major  
557 driver of reef degradation [28] although there has been debate on whether nutrients or overfishing  
558 are more important [6,133]. The levels of inorganic nutrients found in this study were comparable to  
559 the low values of nutrients measured in the Lacro river, near Rural-E, in 2006 (See Appendix) [20]  
560 and not indicative of nutrient pollution.

561 Contrary to expected, combined nitrate and nitrite and phosphate averages were highest at  
562 Rural-N at 10 m which could be indicative of upwelling [64,134,135]. Slightly elevated nutrients off  
563 Ataúro Island in the channel at 10 m may suggest upwelling of deeper, nutrient-rich water [90,136].  
564 Other sources of nutrients at depth to consider is submarine groundwater discharge [137].  
565 Cyanobacteria overgrowth was only found at high levels at Urban-W 10 m in 2015 (6.1% prevalence)  
566 which can be a sign of elevated nutrients or other disturbances (e.g., ship strikes, etc.) [138–140];  
567 however, seawater nutrients and stable isotope values were not significantly higher at this site during  
568 our sampling. In 2017, the prevalence of cyanobacteria decreased to 0.0% indicating cyanobacteria in  
569 2015 was an ephemeral bloom. Although,  $\text{NH}_4^+$  was not significantly different between surveyed sites  
570 except Rural-E 5 m, the range of  $1.32 \pm 0.17 \mu\text{M}$  to  $2.69 \pm 0.78 \mu\text{M}$  was more than the previously  
571 recorded values between  $0.3 \mu\text{M}$  and  $2.2 \mu\text{M}$  on reefs [49,141,142].

572 The stable isotope data were consistent across sites and depths sampled (range 2.5–5.5‰  
573 excluding outliers) and fall within pristine oceanic values of 2–3‰ [44,143] and upwelling values of  
574 5–6‰ [46,59,61–63]. Sewage-affected waters have generally higher  $\delta^{15}\text{N}$  values from 8–22‰  
575 [45,48,57,144,145] and our data was not indicative of high  $\delta^{15}\text{N}$  enrichment. Although the mean was  
576 significantly higher for the *Chlorodesmis* sp. at Urban-W versus Urban-E, the sampling of that alga  
577 was sparse compared to the *Halimeda* sp. Additionally, there was no *Chlorodesmis* sp. found at Rural-  
578 N. Calcareous algae are good integrators of nitrogen over weeks to months versus days with fleshy  
579 macroalgae [56]. Similar values were recorded for both algae collected across sites and depths which  
580 indicates that the influx of nitrogen has been stable across several months. This is likely due to  
581 sampling at the end of the dry season (Mar to Nov) with little terrestrial runoff. There were a few  
582 outliers of much higher (12.17‰, 15.12‰) and lower (-6.79‰)  $\delta^{15}\text{N}$  values within *Halimeda* sp. which  
583 could be indicative of localized inputs on a scale of tens of meters of nutrients such as fish waste or  
584 groundwater discharge. Previous studies reveal that macroalgal  $\delta^{15}\text{N}$  signatures decrease with depth  
585 on range from 5 to 35 m because of land-based pollution [46,48,53,146]. The influence of upwelling is  
586 less clear as both  $\delta^{15}\text{N}$  depletion and enrichment have been reported with upwelling [46,61,64,147].

587 In summary, assigning direct links between the condition of coral reefs and the source of  
588 nutrients is difficult. In the present study, the mean  $\delta^{15}\text{N}$  values of 4.3‰ and 4.2‰ for *Chlorodesmis*



589 *sp.* and *Halimeda sp.* respectively are higher than those reported from the open ocean. Given that the  
590 algae were collected at the end of the six-month dry season, it is unlikely our sampling captured the  
591 effects of terrestrial and river run-off and potential sewage pollution. Significant seasonal differences  
592 in sampling of macroalgae for stable isotope analysis have been demonstrated [47] and further  
593 seasonal investigations could elucidate the source of nutrients in nearshore waters. The seawater  
594 nutrient and stable isotope data are likely indicative of oceanic influence with potential upwelling in  
595 the absence of aquaculture industries and heavy use of inorganic fertilizers and pesticides in-country  
596 coupled with sampling conducted after months of no rain. The higher seawater ammonium, nitrate,  
597 nitrite, and phosphate nutrients at Rural-N 10 m depth could indicate short upwelling events that are  
598 too ephemeral to be assimilated by calcareous macroalgae over weeks to months. Rural-N's location  
599 in the Timor Strait and ITF with the large volumes of water movement through the channel [148]  
600 could be more conducive to localized upwelling than the mainland sites.

#### 601 4.4 Elevated temperature and the prevalence of bleaching from thermal stress

602 The surveys in the present study were conducted right before the austral summer during the  
603 2015 ENSO event which triggered mass bleaching worldwide [21]. The CRWTL virtual monitoring  
604 station indicated that the temperature began rising above the monthly maximum mean in November  
605 2015; however, care must be taken given that the satellite data only measures the temperature of the  
606 first 10–20  $\mu\text{m}$  of the ocean surface [149]. Satellite temperature products can therefore be ineffective  
607 in coastal waters due to pixels mostly encompassing open ocean versus coastal waters. Additionally,  
608 Timorese reefs are very steep and close to the coast [136] where satellite data are unreliable due to  
609 the potential interference of land temperatures.

610 *In situ* temperature varied between the three sites and between months. Most interestingly, there  
611 was a divergence between the *in situ* and CRWTL temperature data during the austral summer  
612 months. The surveys in 2015 were conducted in November at the onset of austral summer and the  
613 yearly ocean temperature maximum. In 2017, the surveys were conducted in July approaching the  
614 yearly ocean temperature minimum. Timor-Leste appeared to have experienced lower levels of  
615 bleaching compared to other regions of the world such as the Northern Great Barrier Reef (NGBR),  
616 one of the most severely affected by bleaching. The CRWTL accumulated DHWs for 55% of the days  
617 between survey periods compared to 49% of days over the same time in the NGBR. The magnitude  
618 of DHWs in the NGBR reached 13.59°C-weeks, more than double the 5.79°C-weeks maximum in  
619 Timor-Leste. Comparison of *in situ* bleaching surveys and DHWs on the GBR indicate that 2–3°C-  
620 weeks are associated with low levels of bleaching, > 4 °C-weeks with 30–40% corals bleached, and > 8  
621 °C-weeks with an average of 70–90% of corals bleached [67,68]. The bleaching severity of the NGBR  
622 was greater than 60% bleached for all surveyed reefs in 2016 and, although there is no data on the  
623 extent or severity of bleaching on reefs in Timor-Leste, DHW data would project mass coral bleaching  
624 in Timor-Leste of around 30–40%.

625 Local dive operators reported mass coral bleaching at Jaco Island at the end of March. By the  
626 end of May, 90% of *Goniopora sp.* on Ataúro Island were bleaching (Figure A4a), massive *Porites sp.*  
627 from 5–18 m at Jaco Island (Figure A4b), and staghorn Acroporids in the shallows of the same area.  
628 Bleaching reportedly began in the shallows and progressively affected corals at deeper sites. The  
629 timing of the bleaching also matches the *in situ* temperature logger data where the mean monthly  
630 temperatures exceeded the MMM in March 2016 versus November 2015 for the CRWTL SST data  
631 (Figure 7). The *in situ* temperatures never exceeded the MMM + 1°C threshold for mass bleaching.  
632 The range of the temperature loggers during December 2015 was from 27°C to almost 31°C so reefs  
633 did experience elevated temperatures, but not for prolonged periods. The *in situ* mean temperature  
634 began to creep over the MMM and close the gap with the CRWTL data in March and April of 2016.  
635 The loggers approached MMM + 1°C in May of 2016 five months after the CRWTL temperatures had  
636 been above the bleaching threshold (Figure 7). The *in situ* data is limited to the Dili, Ataúro Island,  
637 and Manatuto areas which may not be representative of temperature regimes in the Jaco Island  
638 region. Even so, anecdotal evidence of the most bleaching in May 2016 in both Ataúro and Jaco

639 Islands follows the temperature timeline of the logger data. CRWTL predicting bleaching too early  
640 in Timor-Leste.

641 Based on the comparison of *in situ* temperature logger data in Timor-Leste and the satellite-  
642 derived SST, CRWTL overestimates the bleaching stress in-country. During the austral summer  
643 CRWTL SST was more than 1.5°C warmer than the *in situ* data at 10 and even 5 m depth in both years  
644 (Figure 7). This could be due to seasonal changes in the oceanography that increased water  
645 movement, or increased upwelling along the north coast coinciding with the northwest monsoon  
646 during the austral summer. The significant divergence between the *in situ* and CRWTL temperatures,  
647 during this time of year, point to seasonal oceanography (i.e., upwelling or internal waves)  
648 influencing temperature on shallow reefs without reaching the surface to affect remotely sensed SST.  
649 The northwest monsoon season from December to March is associated with a weak reversal in the  
650 flow of the ITF [150]. Whether this is associated with coastal upwelling remains unclear; however,  
651 there is clear seasonal variability of the ITF. Additionally, the temperature range in December 2016 is  
652 27–31°C, nearly 4°C, in all six loggers compared to 29–31°C in December 2017. ENSO could be  
653 strengthening upwelling along the north coast of Timor-Leste bringing up cooler water to shallow  
654 reefs while the SSTs are elevated above the bleaching threshold.

655 The effect of upwelling could be a protective factor for Timorese reefs against climate change;  
656 however, the divergence in temperatures between CRWTL and logger temperature data appears to  
657 be seasonal as the temperatures converge around April/May of 2016 when seasonal upwelling may  
658 subside (Figure 7). Coral bleaching did occur in Timor-Leste only not to the same extent as other reef  
659 regions. Although this mitigation of elevated temperature is positive, other potential impacts must  
660 also be considered. For example, the exposure to cooler upwelled waters regularly acclimatizes the  
661 corals to these conditions and could potentially make them more sensitive to elevated temperatures  
662 once upwelling stops. Additionally, Timor-Leste was identified as having the lowest calcification  
663 rates out of all the NOAA Indo-Pacific monitoring sites [79] which could be associated with  
664 hypercapnic (CO<sub>2</sub>-rich) upwelled waters [151]. This lower calcification could affect Timorese reef's  
665 ability to cope with sea-level rise and recover from disturbances such as physical damage and  
666 bleaching. There is, however, evidence that calcifying organisms are able to withstand seasonal  
667 increases in acidity potentially relying on increased heterotrophic feeding [152,153]. Clearly, further  
668 research on the oceanography of the region and interactions between environmental parameters  
669 (light, temperature, CO<sub>2</sub>, salinity, etc.) are critical to understanding and effectively managing the  
670 country's marine resources.

## 671 5. Conclusion

672 The present study set out to understand the nature of both local and global threats to the  
673 relatively understudied coral reefs of Timor-Leste. Baseline information on these systems is limited  
674 despite the current and future importance of these marine resources to Timor-Leste. There were two  
675 major objectives of the present project. The first was to explore the state of coral reefs, particularly  
676 concerning the presence of coral disease or other evidence of compromised health and benthic  
677 composition. The second was to assess the impact of humans on issues such as water quality and  
678 climate change. Coral reefs of the north coast of Timor-Leste are characterized by high amounts of  
679 coral cover as much as 58.2 ± 6.4%. The concern, however, is that sites close to the urban areas of the  
680 capital city, Dili, are showing signs of significant degradation with < 5% hard coral cover at 5 m at  
681 one of the two urban sites. Also, there is the global problem of heat stress from climate change driving  
682 additional pressure on coral reef systems. Like coral reefs everywhere, a failure to act to drastically  
683 and reduce emissions of greenhouse gases from burning fossil fuels and land-use change will see  
684 further and more rapid degradation of the coral reef resources of Timor-Leste [154].

685 The human population density of sites did not directly correlate with the condition of coral reefs.  
686 The only consistent presence of infectious coral disease was found only at a rural site with low human  
687 population density. Other signs of compromised coral health such as algal overgrowth, burrowing  
688 barnacles, etc. were much more widespread across all sites. The underlying differences in coral  
689 community structure were key to the prevalence of WS on tabulate Acroporids which may have been

690 shaped by human impacts such as subsistence livelihoods and degradation of watersheds. There  
691 were two lines of evidence at local scales, temperature, and nutrients (both seawater concentrations  
692 and algal  $\delta^{15}\text{N}$  signatures), that indicated upwelling is a significant feature influencing the shallow  
693 reefs of the north coast of Timor-Leste. This upwelling appears to lessen the impact and length of  
694 bleaching events, although more research across larger spatial and temporal scales is necessary.  
695 While it is fortunate the mass bleaching event did not cause large scale coral mortality in Timor-Leste,  
696 the sublethal effects pose another threat to already highly impacted reefs.

697 Over 300 million people rely on coastal resources for economic livelihoods and cultural practices  
698 in the CT [155]. Sustainable management of these resources ties into larger socio-economic issues  
699 such as food security in Timor-Leste. Fishing is an important means of protein and nutrients and vital  
700 for food security nationally and dominated by artisanal, low-efficiency methods [17,155,156]. The  
701 fishing industry in-country is largely contained to subsistence practices because of a lack of reliable  
702 road, electric, and refrigeration infrastructure. As these systems are developed and the capabilities  
703 and supply chains to transport fish increases and these developments must be monitored.  
704 Additionally, *meti*, or gleaning, is an important component of subsistence fishing. In urban areas, the  
705 differences between ease of access between Urban-W and Urban-E seemed to play an important role  
706 in the types of human impacts present (i.e., recreational versus extractive). Localized impacts such as  
707 fishing (including blast fishing pre-independence) and gleaning, which over the last several decades,  
708 were observed and likely affected coral cover and diversity in both urban and rural areas.

709 To address these large and small-scale impacts, coral reef management needs targeted local and  
710 national actions. Ultimately, the health of coral reefs is tied to the unique social and economic  
711 development needs of the country as a whole. At a local level, the resurgence of *tara bandu* with  
712 increased interest in community marine protected areas (MPAs) is promising for the future of  
713 Timorese reefs. *Tara bandu* is customary law that administers prohibition designations in  
714 communities banning practices such as tree-cutting [157–159]. These designations are well-adhered  
715 to within communities, but appear to be more effective in rural areas [158]. For MPAs, certain reefs  
716 are established as no-take, ecotourism zones where visitors pay a small fee for snorkeling and diving.  
717 The reef housing the Rural-N site in this study was designated as an MPA six weeks before the  
718 resurvey in July 2017 and a small fee was paid. Fishermen were witnessed bypassing the reef by  
719 canoe to fish on the adjacent reef to the north. Currently, the formation of MPAs is centered on Ataúro  
720 Island, but the success and income generated for the community are seeing this practice expand to  
721 other communities. The level of community engagement in designating marine reserves provides a  
722 positive outlook for coral reef management although the long-term impacts of COVID-19 remain to  
723 be seen.

724 Assuming the international community takes strong action under the Paris Climate Agreement,  
725 it will be very important for countries such as Timor-Leste to establish effective management of its  
726 coral reef resources. This lies at the heart of international strategies such as the 50 Reefs project and  
727 the evidence here corroborates Timor-Leste's inclusion as a climate robust reef region [160,161]. At a  
728 country-scale, developing a national network of MPAs, rebuilding healthy watersheds, and  
729 understanding vulnerability to climate change is key to the sustainable management of coral reefs.  
730 Ideally, a systematic approach would be taken to establish no-take and mixed-used zones across all  
731 Timorese waters incorporating MPAs and the national marine park. Establishing a national plan  
732 before the development of tourism and industrial industries would be beneficial in ensuring a certain  
733 level of sustainable management of coastal resources. Lastly, monitoring the heat stress and bleaching  
734 of Timorese reefs must continue and further research of the oceanography along the coasts (especially  
735 possible benefits from upwelling) will advance the understanding of the country's vulnerability to  
736 climate change as a whole.

737

738 **Acknowledgments:** We gratefully acknowledge the following sources of funding that supported this research:  
739 the Global Change Institute at the University of Queensland, the Society of Conservation Biology, and the  
740 Winifred Violet Scott Trust. Many thanks to the Ministry of Agriculture and Fisheries in Timor-Leste, Trudiann  
741 Dale and the marine team at Conservation International Timor-Leste, volunteers Dominic Bryant, Craig  
742 Heatherington, Peran Bray, and Fiona Ryan for fieldwork support, Sarah Naylor, Rachel Hazel, Abbie Taylor,  
743 Shari Stepanoff, and Susie Green for logistical support. Thank you to the Compass Boating & Diving and  
744 Aquatica crews. Samples were exported from Timor-Leste under export permit No. 455 and imported to  
745 Australia under AQIS import permit IP15000663.

746 **Author Contributions:** Conceptualization, C.K. and S.D.; methodology, C.K. and S.D.; formal analysis, C.K. and  
747 S.D.; investigation, C.K.; resources, C.K.; data curation, C.K.; writing—original draft preparation, C.K.;  
748 writing—review and editing, C.K., S.D., O.H-G.; visualization, C.K.; supervision, S.D., C.R., and O.H-G.; project  
749 administration, C.K.; funding acquisition, C.K. and O.H-G. All authors have read and agreed to the published  
750 version of the manuscript.

751 **Funding:** This research was funded by the ARC Laureate FL 120100066 to O.H-G.; the Society of Conservation  
752 Biology small grant award; and the Winifred Violet Scott Trust.

753 **Conflicts of Interest:** The authors declare no conflict of interest. The funders had no role in the design of the  
754 study; in the collection, analyses, or interpretation of data; in the writing of the manuscript, or in the decision to  
755 publish the results.

756



757 **6. References**

- 758 1. Burke, L.; Reytar, K.; Spalding, M.; Perry, A. *Reefs at Risk Revisited in the Coral Triangle*; 2012; ISBN 978-1-  
759 56973-791-0.
- 760 2. Veron, J.E.N.; Devantier, L.M.; Turak, E.; Green, A.L.; Kininmonth, S.; Stafford-Smith, M.; Peterson, N.  
761 Delineating the Coral Triangle. *Journal of Coral Reef Studies* **2009**, *11*, 91–100, doi:10.3755/galaxea.11.91.
- 762 3. Burke, L.; Reytar, K.; Spalding, M.; Perry, A. *Reefs at Risk Revisited*; World Resources Institute: Washington  
763 D.C., 2011; p. e0116200;.
- 764 4. Harvell, C.D.; Jordan-Dahgren, E.; Merkel, S.; Rosenberg, E.; Raymundo, L.; Smith, G.; Weil, E.; Willis, B.  
765 Coral Disease, Environmental Drivers, and the Balance Between. *Oceanography* **2007**, *20*, 172–195.
- 766 5. Hoegh-Guldberg, O.; Mumby, P.J.; Hooten, A.J.; Steneck, R.S.; Greenfield, P.; Gomez, E.; Harvell, H., C.  
767 Drew; Sale, P.F.; Edwards, A.J.; Caldeira, K.; et al. Coral reefs under rapid climate change and ocean  
768 acidification. *Science* **2007**, *318*, 1737–42, doi:10.1126/science.1152509.
- 769 6. Jackson, J.B.C. Historical Overfishing and the Recent Collapse of Coastal Ecosystems. *Science* **2001**, *293*,  
770 629–637, doi:10.1126/science.1059199.
- 771 7. Bruno, J.F.; Selig, E.R.; Casey, K.S.; Page, C.A.; Willis, B.L.; Harvell, C.D.; Sweatman, H.; Melendy, A.M.  
772 Thermal stress and coral cover as drivers of coral disease outbreaks. *PLoS Biology* **2007**, *5*, 1220–1227,  
773 doi:10.1371/journal.pbio.0050124.
- 774 8. Pollock, F.J.; Lamb, J.B.; Field, S.N.; Heron, S.F.; Schaffelke, B.; Shedrawi, G.; Bourne, D.G.; Willis, B.L.  
775 Sediment and turbidity associated with offshore dredging increase coral disease prevalence on nearby  
776 reefs. *PLoS ONE* **2014**, *9*, doi:10.1371/journal.pone.0102498.
- 777 9. Raymundo, L.J.; Halford, A.R.; Maypa, A.P.; Kerr, A.M. Functionally diverse reef-fish communities  
778 ameliorate coral disease. *Proceedings of the National Academy of Sciences of the United States of America* **2009**,  
779 *106*, 17067–70, doi:10.1073/pnas.0900365106.
- 780 10. Yoshioka, R.M.; Kim, C.J.S.; Tracy, A.M.; Most, R.; Harvell, C.D. Linking sewage pollution and water  
781 quality to spatial patterns of *Porites lobata* growth anomalies in Puako, Hawaii. *Marine Pollution Bulletin*  
782 **2016**, *104*, doi:10.1016/j.marpolbul.2016.01.002.
- 783 11. Heron, S.F.; Maynard, J.A.; van Hooedonk, R.; Eakin, C.M. Warming Trends and Bleaching Stress of the  
784 World's Coral Reefs 1985–2012. *Sci Rep* **2016**, *6*, 38402, doi:10.1038/srep38402.
- 785 12. Macaulay, J. Timor Leste: Newest and Poorest of Asian Nations. *Geography* **2003**, *88*, 40–46.
- 786 13. Barbosa, M.; Booth, S. Timor-Leste's fisheries catches (1950-2009): Fisheries under different regimes. In  
787 *Fisheries catch reconstructions: Islands, Part I*; Zeller, D., Harper, S., Eds.; Fisheries Centre, University of  
788 British Columbia: Vancouver, Canada, 2009; Vol. 17, pp. 39–52.
- 789 14. Kingsbury, D.; Soares, D.B.; Harris, V.; Fox, J.J.; Bateman, S.; Bergin, A. A Reliable Partner: Strengthening  
790 Australia – Timor-Leste Relations. *Australian Strategic Policy Institute Limited* **2011**, 68.
- 791 15. McWilliam, A. Perspectives on customary marine tenures in East Timor. *The Asia Pacific Journal of*  
792 *Anthropology* **2002**, *3*, 6–32, doi:10.1080/14442210210001706266.
- 793 16. Tilley, A.; Burgos, A.; Duarte, A.; Dos Reis Lopes, J.; Eriksson, H.; Mills, D.J. Contribution of women's  
794 fisheries substantial, but overlooked, in Timor-Leste. **2020**, doi:https://dx.doi.org/10.1007/s13280-020-  
795 01335-7.
- 796 17. RDTL *Timor-Leste Strategic Development Plan 2011 - 2030*; Republica Democratica de Timor-Leste: Dili,  
797 Timor-Leste, 2011; pp. 1–215;.
- 798 18. JICA *The Study on Community-based Integrated Watershed Management in Laclo and Comoro River Basins in the*  
799 *Democratic Republic of Timor-Leste*; Japan International Cooperation Agency, 2010; pp. 1–43;.
- 800 19. Sandlund, O.T.; Bryceson, I.; de Carvalho, D.; Rio, N.; da Silva, J.; Silva, M.I. *Assessing Environmental Needs*  
801 *and Priorities in Timor-Leste*; United Nations Development Programme (UNDP) commissioned paper. New  
802 York: UNDP, 2001;
- 803 20. Alongi, D.M.; Amaral, A.; de Carvalho, N.; McWilliam, A.; Rouwenhorst, J.; Tirendi, F.; Trott, L.; Wasson,  
804 R.J. *River Catchments and Marine Productivity in Timor Leste: Caraulun and Laclo Catchments; South and North*  
805 *Coasts - Final Report*; Ministry of Agriculture & Fisheries, Government of Timor Leste, 2012;
- 806 21. Hughes, T.P.; Anderson, K.D.; Connolly, S.R.; Heron, S.F.; Kerry, J.T.; Lough, J.M.; Baird, A.H.; Baum, J.K.;  
807 Berumen, M.L.; Bridge, T.C.; et al. Spatial and temporal patterns of mass bleaching of corals in the  
808 Anthropocene. *Science* **2018**, *359*, 80–83, doi:10.1126/science.aan8048.
- 809 22. Aronson, R.B.; Precht, W.F. White-band disease and the changing face of Caribbean coral reefs.  
810 *Hydrobiologia* **2001**, *460*, 25–38.

- 811 23. Myers, R.L.; Raymundo, L.J. Coral disease in Micronesian reefs: A link between disease prevalence and  
812 host abundance. *Diseases of Aquatic Organisms* **2009**, *87*, 97–104, doi:10.3354/dao02139.
- 813 24. Weil, E.; Irikawa, A.; Casareto, B.; Suzuki, Y. Extended geographic distribution of several Indo-Pacific coral  
814 reef diseases. *Dis. Aquat. Org.* **2012**, *98*, 163–170, doi:10.3354/dao02433.
- 815 25. Willis, B.L.; Page, C.A.; Dinsdale, E.A. Coral disease on the Great Barrier Reef. *Coral Health and Disease* **2004**,  
816 69–104.
- 817 26. Beeden, R.; Willis, B.L.; Page, C.A.; Weil, E. *Underwater Cards for Assessing Coral Health on Indo-Pacific Reefs*;  
818 2008;
- 819 27. Raymundo, L.J.; Couch, C.S.; Bruckner, A.W.; Harvell, C.D. *Coral Disease Handbook Guidelines for*  
820 *Assessment: Guidelines for Assessment Monitoring and Management*; Currie Communications: Melbourne,  
821 Australia, 2008; ISBN 978-1-921317-01-9.
- 822 28. Fabricius, K.E. Effects of terrestrial runoff on the ecology of corals and coral reefs: Review and synthesis.  
823 *Marine Pollution Bulletin* **2005**, *50*, 125–146, doi:10.1016/j.marpolbul.2004.11.028.
- 824 29. Aronson, R.B.; Macintyre, I.G.; Wapnick, C.M.; O'Neill, M.W. Phase shifts, alternative states, and the  
825 unprecedented convergence of two reef systems. *Ecology* **2004**, *85*, 1876–1891, doi:10.1890/03-0108.
- 826 30. Cleary, D.F.R.; Suharsono; Hoeksema, B.W. Coral diversity across a disturbance gradient in the Pulau  
827 Seribu reef complex off Jakarta, Indonesia. In *Marine, Freshwater, and Wetlands Biodiversity Conservation*;  
828 Hawksworth, D.L., Bull, A.T., Eds.; Springer Netherlands: Dordrecht, 2006; pp. 285–306 ISBN 978-1-4020-  
829 5734-2.
- 830 31. Baker, D.M.; MacAvoy, S.E.; Kim, K. Relationship between water quality,  $\delta^{15}\text{N}$ , and aspergillois of  
831 Caribbean sea fan corals. *Mar. Ecol. Prog. Ser.* **2007**, *343*, 123–130, doi:10.3354/meps06937.
- 832 32. Vega Thurber, R.L.; Burkepille, D.E.; Fuchs, C.; Shantz, A. a; McMinds, R.; Zaneveld, J.R. Chronic nutrient  
833 enrichment increases prevalence and severity of coral disease and bleaching. *Global change biology* **2014**, *20*,  
834 544–54, doi:10.1111/gcb.12450.
- 835 33. Voss, J.D.; Richardson, L.L. Nutrient enrichment enhances black band disease progression in corals. *Coral*  
836 *Reefs* **2006**, *25*, 569–576, doi:10.1007/s00338-006-0131-8.
- 837 34. Wagner, D.E.; Kramer, P.; Woesik, R. van Species composition, habitat, and water quality influence coral  
838 bleaching in southern Florida. *Marine Ecology Progress Series* **2010**, *408*, 65–78, doi:10.3354/meps08584.
- 839 35. Wooldridge, S.A.; Done, T.J. Improved water quality can ameliorate effects of climate change on corals.  
840 *Ecological Applications* **2009**, *19*, 1492–1499, doi:10.1890/08-0963.1.
- 841 36. Amato, D.W.; Bishop, J.M.; Glenn, C.R.; Dulai, H.; Smith, C.M. Impact of Submarine Groundwater  
842 Discharge on Marine Water Quality and Reef Biota of Maui. *PLoS One* **2016**, *11*,  
843 doi:10.1371/journal.pone.0165825.
- 844 37. Dinsdale, E.A.; Pantos, O.; Smriga, S.; Edwards, R.A.; Angly, F.; Wegley, L.; Hatay, M.; Hall, D.; Brown, E.;  
845 Haynes, M.; et al. Microbial Ecology of Four Coral Atolls in the Northern Line Islands. *PLoS ONE* **2008**, *3*,  
846 e1584, doi:10.1371/journal.pone.0001584.
- 847 38. Osawa, Y.; Fujita, K.; Umezawa, Y.; Kayanne, H.; Ide, Y.; Nagaoka, T.; Miyajima, T.; Yamano, H. Human  
848 impacts on large benthic foraminifers near a densely populated area of Majuro Atoll, Marshall Islands.  
849 *Marine Pollution Bulletin* **2010**, *60*, 1279–1287, doi:10.1016/j.marpolbul.2010.03.014.
- 850 39. Smith, J.; Smith, C.; Hunter, C. An experimental analysis of the effects of herbivory and nutrient enrichment  
851 on benthic community dynamics on a Hawaiian reef. *Coral Reefs* **2001**, *19*, 332–342,  
852 doi:10.1007/s003380000124.
- 853 40. Vega Thurber, R.L.; Burkepille, D.E.; Fuchs, C.; Shantz, A.A.; McMinds, R.; Zaneveld, J.R. Chronic nutrient  
854 enrichment increases prevalence and severity of coral disease and bleaching. *Glob Change Biol* **2014**, *20*, 544–  
855 54, doi:10.1111/gcb.12450.
- 856 41. Aeby, G.S.; Williams, G.J.; Franklin, E.C.; Kenyon, J.; Cox, E.F.; Coles, S.; Work, T.M. Patterns of coral  
857 disease across the Hawaiian archipelago: relating disease to environment. *PloS one* **2011**, *6*, e20370,  
858 doi:10.1371/journal.pone.0020370.
- 859 42. Bruno, J.F.; Petes, L.E.; Harvell, C.D.; Hettinger, A. Nutrient enrichment can increase the severity of coral  
860 diseases. *Ecology Letters* **2003**, *6*, 1056–1061, doi:10.1046/j.1461-0248.2003.00544.x.
- 861 43. Kaczmarzsky, L.; Richardson, L.L. Do elevated nutrients and organic carbon on Philippine reefs increase  
862 the prevalence of coral disease? *Coral Reefs* **2010**, *30*, 253–257, doi:10.1007/s00338-010-0686-2.

- 863 44. Costanzo, S.D.; O'Donohue, M.J.; Dennison, W.C.; Loneragan, N.R.; Thomas, M. A New Approach for  
864 Detecting and Mapping Sewage Impacts. *Marine Pollution Bulletin* **2001**, *42*, 149–156, doi:10.1016/S0025-  
865 326X(00)00125-9.
- 866 45. Dailer, M.L.; Ramey, H.L.; Saephan, S.; Smith, C.M. Algal  $\delta^{15}\text{N}$  values detect a wastewater effluent plume  
867 in nearshore and offshore surface waters and three-dimensionally model the plume across a coral reef on  
868 Maui, Hawai'i, USA. *Marine pollution bulletin* **2012**, *64*, 207–13, doi:10.1016/j.marpolbul.2011.12.004.
- 869 46. Lapointe, B.E.; Barile, P.J.; Littler, M.M.; Littler, D.S. Macroalgal blooms on southeast Florida coral reefs: II.  
870 Cross-shelf discrimination of nitrogen sources indicates widespread assimilation of sewage nitrogen.  
871 *Harmful Algae* **2005**, *4*, 1106–1122, doi:10.1016/j.hal.2005.06.002.
- 872 47. Lapointe, B.E.; Barile, P.J.; Matzie, W.R. *Anthropogenic nutrient enrichment of seagrass and coral reef*  
873 *communities in the Lower Florida Keys: discrimination of local versus regional nitrogen sources*; 2004; Vol. 308;  
874 ISBN 1-77246-524-0.
- 875 48. Lin, H.J.; Wu, C.Y.; Kao, S.J.; Kao, W.Y.; Meng, P.J. Mapping anthropogenic nitrogen through point sources  
876 in coral reefs using  $\delta^{15}\text{N}$  in macroalgae. *Marine Ecology Progress Series* **2007**, *335*, 95–109,  
877 doi:10.3354/meps335095.
- 878 49. Moynihan, M. a; Baker, D.M.; Mmochi, A.J. Isotopic and microbial indicators of sewage pollution from  
879 Stone Town, Zanzibar, Tanzania. *Marine pollution bulletin* **2012**, *64*, 1348–55,  
880 doi:10.1016/j.marpolbul.2012.05.001.
- 881 50. Redding, J.E.; Myers-Miller, R.L.; Baker, D.M.; Fogel, M.; Raymundo, L.J.; Kim, K. Link between sewage-  
882 derived nitrogen pollution and coral disease severity in Guam. *Marine Pollution Bulletin* **2013**, *73*, 57–63,  
883 doi:10.1016/j.marpolbul.2013.06.002.
- 884 51. Savage, C.; Elmgren, R. MACROALGAL (FUCUS VESICULOSUS)  $\delta^{15}\text{N}$  VALUES TRACE DECREASE IN  
885 SEWAGE INFLUENCE. *Ecological Applications* **2004**, *14*, 517–526, doi:10.1890/02-5396.
- 886 52. Sutherland, K.P.; Porter, J.W.; Turner, J.W.; Thomas, B.J.; Looney, E.E.; Luna, T.P.; Meyers, M.K.; Futch,  
887 J.C.; Lipp, E.K. Human sewage identified as likely source of white pox disease of the threatened Caribbean  
888 elkhorn coral, *Acropora palmata*. *Environmental microbiology* **2010**, *12*, 1122–31, doi:10.1111/j.1462-  
889 2920.2010.02152.x.
- 890 53. Umezawa, Y.; Miyajima, T.; Kayanne, H.; Koike, I. Significance of groundwater nitrogen discharge into  
891 coral reefs at Ishigaki Island, southwest of Japan. *Coral Reefs* **2002**, *21*, 346–356, doi:10.1007/s00338-002-0254-  
892 5.
- 893 54. Fry, B.; Baltz, D.M.; Benfield, M.C.; Fleeger, J.W.; Gace, A.; Haas, H.L.; Quiñones-Rivera, Z.J. Stable isotope  
894 indicators of movement and residency for brown shrimp (*Farfantepenaeus aztecus*) in coastal Louisiana  
895 marshscapes. *Estuaries* **2003**, *26*, 82–97, doi:10.1007/BF02691696.
- 896 55. Dailer, M.L.; Knox, R.S.; Smith, J.E.; Napier, M.; Smith, C.M. Using delta  $^{15}\text{N}$  values in algal tissue to map  
897 locations and potential sources of anthropogenic nutrient inputs on the island of Maui, Hawai'i, USA.  
898 *Marine pollution bulletin* **2010**, *60*, 655–71, doi:10.1016/j.marpolbul.2009.12.021.
- 899 56. Gartner, A.; Lavery, P.; Smit, A.J. Use of  $\delta^{15}\text{N}$  signatures of different functional forms of macroalgae and  
900 filter-feeders to reveal temporal and spatial patterns in sewage dispersal. *Marine Ecology Progress Series*  
901 **2002**, *235*, 63–73, doi:10.3354/meps235063.
- 902 57. Heaton, T.H.E. Isotopic studies of nitrogen pollution in the hydrosphere and atmosphere: A review.  
903 *Chemical Geology: Isotope Geoscience Section* **1986**, *59*, 87–102, doi:10.1016/0168-9622(86)90059-X.
- 904 58. Tucker, J.; Sheats, N.; Giblin, A.E.; Hopkinson, C.S.; Montoya, J.P. Using stable isotopes to trace sewage-  
905 derived material through Boston Harbor and Massachusetts Bay. *Marine Environmental Research* **1999**, *48*,  
906 353–375, doi:10.1016/S0141-1136(99)00069-0.
- 907 59. Lamb, K.; Swart, P.; Altabet, M. Nitrogen and Carbon Isotopic Systematics of the Florida Reef Tract. *Bulletin*  
908 *of Marine Science* **2012**, *88*, 119–146, doi:10.5343/bms.2010.1105.
- 909 60. Montoya, J.P.; Carpenter, E.J.; Capone, D.G. Nitrogen fixation and nitrogen isotope abundances in  
910 zooplankton of the oligotrophic North Atlantic. *Limnology and Oceanography* **2002**, *47*, 1617–1628,  
911 doi:10.4319/lo.2002.47.6.1617.
- 912 61. Huang, H.; Li, X.B.; Titlyanov, E.A.; Ye, C.; Titlyanova, T.V.; Guo, Y.P.; Zhang, J. Linking macroalgal  $\delta^{15}\text{N}$ -  
913 values to nitrogen sources and effects of nutrient stress on coral condition in an upwelling region. *Botanica*  
914 *Marina* **2013**, *56*, doi:10.1515/bot-2012-0223.

- 915 62. Leichter, J.J.; Wankel, S.; Paytan, A.; Hanson, K.; Miller, S.; Altabet, M.A. Nitrogen and oxygen isotopic  
916 signatures of subsurface nitrate seaward of the Florida Keys reef tract. *Limnol. Oceanogr.* **2007**, *52*, 1258–  
917 1267, doi:10.4319/lo.2007.52.3.1258.
- 918 63. Sigman, D.M.; Altabet, M.A.; McCorkle, D.C.; Francois, R.; Fischer, G. The  $\delta^{15}\text{N}$  of nitrate in the Southern  
919 Ocean: Nitrogen cycling and circulation in the ocean interior. *J. Geophys. Res.* **2000**, *105*, 19599–19614,  
920 doi:10.1029/2000JC000265.
- 921 64. Firstater, F.N.; Hidalgo, F.J.; Lomovasky, B.J.; Tarazona, J.; Flores, G.; Iribarne, O.O. Coastal upwelling may  
922 overwhelm the effect of sewage discharges in rocky intertidal communities of the Peruvian coast. *Mar.*  
923 *Freshwater Res.* **2010**, *61*, 309, doi:10.1071/MF09102.
- 924 65. Eakin, C.M.; Liu, G.; Gomez, A.M.; De La Cour, J.L.; Heron, S.F.; Skirving, W.J.; Geiger, E.F.; Marsh, B.L.;  
925 Tirak, K.V.; Strong, A.E. Ding, Dong, The Witch is Dead (?) - Three Years of Global Coral Bleaching 2014–  
926 2017. *Reef Encounter* **2017**, *32*, 33–38.
- 927 66. NOAA Coral Reef Watch NOAA Coral Reef Watch Version 3.0 Daily Goba 50km Satellite Virtual Station  
928 Time Series Data for Timor-Leste, Aug. 1, 2015 - Aug. 31, 2017 Available online:  
929 [https://coralreefwatch.noaa.gov/product/vs/timeseries/coral\\_triangle.php#timor\\_leste](https://coralreefwatch.noaa.gov/product/vs/timeseries/coral_triangle.php#timor_leste).
- 930 67. Hughes, T.P.; Kerry, J.T.; Álvarez-Noriega, M.; Álvarez-Romero, J.G.; Anderson, K.D.; Baird, A.H.;  
931 Babcock, R.C.; Beger, M.; Bellwood, D.R.; Berkelmans, R.; et al. Global warming and recurrent mass  
932 bleaching of corals. *Nature* **2017**, *543*, 373–377, doi:10.1038/nature21707.
- 933 68. Strong, A.E.; Liu, G.; Skirving, W.; Eakin, C.M. NOAA’s Coral Reef Watch program from satellite  
934 observations. *Annals of GIS* **2011**, *17*, 83–92, doi:10.1080/19475683.2011.576266.
- 935 69. Liu, G.; Strong, A.E.; Skirving, W.; Arzayus, L.F. Overview of NOAA Coral Reef Watch Program’s Near-  
936 Real- Time Satellite Global Coral Bleaching Monitoring Activities. In Proceedings of the Proceedings of  
937 10th International Coral Reef Symposium, 1783-1793; 2006; pp. 1783–1793.
- 938 70. Baird, A.H.; Marshall, P.A. Mortality, growth and reproduction in scleractinian corals following bleaching  
939 on the Great Barrier Reef. *Marine Ecology Progress Series* **2002**, *237*, 133–141, doi:10.3354/meps237133.
- 940 71. Marshall, P.A.; Baird, A.H. Bleaching of corals on the Great Barrier Reef: differential susceptibilities among  
941 taxa. *Coral Reefs* **2000**, *19*, 155–163, doi:10.1007/s003380000086.
- 942 72. Harvell, C.D.; Kim, K.; Burkholder, J.M.; Colwell, R.R.; Epstein, P.R.; Grimes, D.J.; Hofmann, E.E.; Lipp,  
943 E.K.; Osterhaus, A.D.; Overstreet, R.M.; et al. Emerging marine diseases—climate links and anthropogenic  
944 factors. *Science* **1999**, *285*, 1505–10.
- 945 73. Harvell, C.D.; Mitchell, C.E.; Ward, J.R.; Altizer, S.; Dobson, A.P.; Ostfeld, R.S.; Samuel, M.D. Climate  
946 warming and disease risks for terrestrial and marine biota. *Science* **2002**, *296*, 2158–62,  
947 doi:10.1126/science.1063699.
- 948 74. van der Zande, R.M.; Achlatis, M.; Bender-Champ, D.; Kubicek, A.; Dove, S.; Hoegh-Guldberg, O. Paradise  
949 lost: End-of-century warming and acidification under business-as-usual emissions have severe  
950 consequences for symbiotic corals. *Global Change Biology* **2020**, *26*, 2203–2219, doi:10.1111/gcb.14998.
- 951 75. Brodnicke, O.B.; Bourne, D.G.; Heron, S.F.; Pears, R.J.; Stella, J.S.; Smith, H.A.; Willis, B.L. Unravelling the  
952 links between heat stress, bleaching and disease: fate of tabular corals following a combined disease and  
953 bleaching event. *Coral Reefs* **2019**, *38*, 591–603, doi:10.1007/s00338-019-01813-9.
- 954 76. Gordon, A.L.; Sprintall, J.; Van Aken, H.M.; Susanto, D.; Wijffels, S.; Molcard, R.; Field, A.; Pranowo, W.;  
955 Wirasantosa, S. The Indonesian throughflow during 2004–2006 as observed by the INSTANT program.  
956 *Dynamics of Atmospheres and Oceans* **2010**, *50*, 115–128, doi:10.1016/j.dynatmoce.2009.12.002.
- 957 77. RDTL *Population and Housing Census 2015 Preliminary Results*; Democratic Republic of Timor-Leste (RDTL),  
958 2015; p. 39;.
- 959 78. DNMG; BOM; CSIRO *Current and future climate of Timor-Leste*; Timor-Leste National Directorate of  
960 Meteorology and Geophysics, 2015; pp. 1–8;.
- 961 79. PIFSC *Interdisciplinary baseline ecosystem assessment surveys to inform ecosystem-based management planning in*  
962 *Timor-Leste: Final Report*; NOAA Pacific Islands Fisheries Science Center, 2017; p. 234;.
- 963 80. English, S.; Wilkinson, C.; Baker, V. Survey manual for tropical marine resources. **1997**.
- 964 81. The R Core Team *R: A language and environment for statistical computing*; R Foundation for Statistical  
965 Computing: Vienna, Austria, 2020;
- 966 82. Anderson, M.; Gorley, R.N.; Clarke, K. *PERMANOVA+ for PRIMER: Guide to Software and Statistical*  
967 *Methods*; PRIMER-E Ltd: Plymouth, UK, 2008;
- 968 83. Clarke, K.R.; Gorley, R.N. *Getting started with PRIMER v7*; PRIMER-E: Plymouth, UK, 2015;



- 969 84. Fox, J.; Weisberg, S. *An {R} Companion to Applied Regression*; Sage, Thousand Oaks, CA, 2019;
- 970 85. Lenth, R. *emmeans: Estimated Marginal Means, aka Least-Squares Means*; 2020;
- 971 86. Pinheiro, J.; Bates, D.; Debroy, S.; Sarkar, D.; R Core Team *nlme: Linear and Nonlinear Mixed Effects Models*;
- 972 2020;
- 973 87. Hothorn, T.; Bretz, F.; Westfall, P. Simultaneous Inference in General Parametric Models. *Biometrical Journal*
- 974 **2008**, *50*, 346–363.
- 975 88. Oksanen, J.; Blanchet, F.G.; Friendly, M.; Kindt, R.; Legendre, P.; McGlinn, D.; Minchin, P.; O'Hara, R.B.;
- 976 Simpson, G.L.; Solymos, P.; et al. *vegan: Community Ecology Package*; 2016;
- 977 89. Fitt, W.K.; Cook, C.B. Photoacclimation and the effect of the symbiotic environment on the photosynthetic
- 978 response of symbiotic dinoflagellates in the tropical marine hydroid *Myrionema amboinense*. *Journal of*
- 979 *Experimental Marine Biology and Ecology* **2001**, *256*, 15–31, doi:10.1016/S0022-0981(00)00302-6.
- 980 90. *A rapid marine biological assessment of Timor-Leste*, *RAP Bulletin of Biological Assessment* 66; Erdmann, M.V.,
- 981 Mohan, C., Eds.; Coral Triangle Support Partnership, Conservation International: Dili, Timor-Leste, 2013;
- 982 ISBN 978-1-934151-56-3.
- 983 91. Brown, K.T.; Bender-Champ, D.; Bryant, D.E.P.; Dove, S.; Hoegh-Guldberg, O. Human activities influence
- 984 benthic community structure and the composition of the coral-algal interactions in the central Maldives.
- 985 *Journal of Experimental Marine Biology and Ecology* **2017**, *497*, 33–40, doi:10.1016/j.jembe.2017.09.006.
- 986 92. Bruno, J.F.; Valdivia, A. Coral reef degradation is not correlated with local human population density. *Sci*
- 987 *Rep* **2016**, *6*, 29778, doi:10.1038/srep29778.
- 988 93. Smith, J.E.; Brainard, R.; Carter, A.; Grillo, S.; Edwards, C.; Harris, J.; Lewis, L.; Obura, D.; Rohwer, F.; Sala,
- 989 E.; et al. Re-evaluating the health of coral reef communities: baselines and evidence for human impacts
- 990 across the central Pacific. **2016**.
- 991 94. Wedding, L.M.; Lecky, J.; Gove, J.M.; Walecka, H.R.; Donovan, M.K.; Williams, G.J.; Jouffray, J.-B.;
- 992 Crowder, L.B.; Erickson, A.; Falinski, K.; et al. Advancing the integration of spatial data to map human and
- 993 natural drivers on coral reefs. *PLoS ONE* **2018**, *13*, e0189792, doi:10.1371/journal.pone.0189792.
- 994 95. Edyvane, K.; de Carvalho, N.; Penny, S.; Fernandes, A.; de Cunha, C.; Amaral, A.; Mendes, M.; Pinto, P.
- 995 *Conservation Values, Issues and Planning in the Nino Konis Santana Marine Park, Timor-Leste - Final Report*;
- 996 Ministry of Agriculture & Fisheries, Government of Timor Leste, 2012;
- 997 96. Mills, D.J.; Tilley, A.; Pereira, M.; Hellebrandt, D.; Pereira Fernandes, A.; Cohen, P.J. Livelihood diversity
- 998 and dynamism in Timor-Leste; insights for coastal resource governance and livelihood development.
- 999 *Marine Policy* **2017**, *82*, 206–215, doi:10.1016/j.marpol.2017.04.021.
- 1000 97. Tilley, A.; Burgos, A.; Duarte, A.; Dos Reis Lopes, J.; Eriksson, H.; Mills, D.J. Contribution of women's
- 1001 fisheries substantial, but overlooked, in Timor-Leste. **2020**, doi:[https://dx.doi.org/10.1007/s13280-020-](https://dx.doi.org/10.1007/s13280-020-01335-7)
- 1002 [01335-7](https://dx.doi.org/10.1007/s13280-020-01335-7).
- 1003 98. Teh, L.S.L.; Teh, L.C.L.; Sumaila, U.R. A Global Estimate of the Number of Coral Reef Fishers. *PLoS One*
- 1004 **2013**, *8*, doi:10.1371/journal.pone.0065397.
- 1005 99. da Costa, M.D.J.; Lopes, M.; Ximenes, A.; Ferreira, A.R.; Spyckerelle, L.; Williams, R.; Nesbitt, H.; Erskine,
- 1006 W. Household food insecurity in Timor-Leste. *Food Sec.* **2013**, *5*, 83–94, doi:10.1007/s12571-012-0228-6.
- 1007 100. Cesar, H.; Burke, L.; Pet-Soede, L. *The economics of worldwide coral reef degradation*; Cesar Environmental
- 1008 Economics Consulting, Arnhem, and WWF-Netherlands, 2003; p. 23;.
- 1009 101. Gillett, R. *Fisheries in the economies of the Pacific island countries and territories*.; Asia Development Bank, 2009;
- 1010 102. Andréfouët, S.; Guillaume, M.M.M.; Delval, A.; Rasoamanendrika, F.M.A.; Blanchot, J.; Bruggemann, J.H.
- 1011 Fifty years of changes in reef flat habitats of the Grand Récif of Toliara (SW Madagascar) and the impact
- 1012 of gleaning. *Coral Reefs* **2013**, *32*, 757–768, doi:10.1007/s00338-013-1026-0.
- 1013 103. Woodland, D.J.; Hooper, J. The Effect of Human Trampling on Coral Reefs. *Biol Conserv* **1977**, *11*, 1–4.
- 1014 104. Ayling, A.M.; Ayling, A.L.; Edyvane, K.S.; Penny, S.; de Carvalho, N.; Fernandes, A.; Amaral, A.L.
- 1015 Preliminary biological resource survey of fringing reefs in the proposed Nino Konis Santana Marine Park,
- 1016 Timor-Leste. *Report to the Northern Territory Department of Natural Resources, Environment, and the Arts.*
- 1017 *Palmerston, Northern Territory* **2009**, 830.
- 1018 105. Maynard, J.; van Hooijdonk, R.; Eakin, C.M.; Puotinen, M.; Garren, M.; Williams, G.; Heron, S.F.; Lamb,
- 1019 J.B.; Weil, E.; Willis, B.; et al. Projections of climate conditions that increase coral disease susceptibility and
- 1020 pathogen abundance and virulence. *Nature Climate Change* **2015**, doi:10.1038/nclimate2625.

- 1021 106. Aeby, G.S.; Ross, M.; Williams, G.J.; Lewis, T.D.; Work, T.M. Disease dynamics of Montipora white  
1022 syndrome within Kaneohe Bay, Oahu, Hawaii: distribution, seasonality, virulence, and transmissibility.  
1023 *Diseases of Aquatic Organisms* **2010**, *91*, 1–8, doi:10.3354/dao02247.
- 1024 107. Haapkylä, J.; Unsworth, R.K.F.; Seymour, A.S.; Jessica, M.T.; Flavell, M.; Willis, B.L.; Smith, D.J. Spatio-  
1025 temporal coral disease dynamics in the Wakatobi Marine National Park, South-East Sulawesi, Indonesia.  
1026 *Diseases of Aquatic Organisms* **2009**, *87*, 105–115, doi:10.3354/dao02160.
- 1027 108. Aeby, G.S. Outbreak of coral disease in the Northwestern Hawaiian Islands. *Coral Reefs* **2005**, *24*, 481,  
1028 doi:10.1007/s00338-005-0493-3.
- 1029 109. Roff, G.; Hoegh-Guldberg, O.; Fine, M. Intra-colonial response to Acroporid “white syndrome” lesions in  
1030 tabular Acropora spp. (Scleractinia). *Coral Reefs* **2006**, *25*, 255–264, doi:10.1007/s00338-006-0099-4.
- 1031 110. Haapkylä, J.; Seymour, A.S.; Trebilco, J.; Smith, D. Coral disease prevalence and coral health in the  
1032 Wakatobi Marine Park, south-east Sulawesi, Indonesia. **2007**, 403–414, doi:10.1017/S0025315407055828.
- 1033 111. Johan, O.; Bengen, D.G.; Zamani, N.P.; Suharsono; Sweet, M.J. The Distribution and Abundance of Black  
1034 Band Disease and White Syndrome in Kepulauan Seribu, Indonesia. *HAYATI Journal of Biosciences* **2015**,  
1035 *22*, 105–112, doi:10.1016/j.hjb.2015.09.001.
- 1036 112. Muller, E.M.; Raymundo, L.J.; Willis, B.L.; Haapkylä, J.; Yusuf, S.; Wilson, J.R.; Harvell, D.C. Coral Health  
1037 and Disease in the Spermonde Archipelago and Wakatobi, Sulawesi. **2012**, *1*, 13.
- 1038 113. Muller, E.M.; van Woesik, R. Caribbean coral diseases: primary transmission or secondary infection? *Glob*  
1039 *Change Biol* **2012**, *18*, 3529–3535, doi:10.1111/gcb.12019.
- 1040 114. Aeby, G.S.; Work, T.M.; Bourne, D.G.; Wilson, B. Coral Diversity and the Severity of Disease Outbreaks: A  
1041 Cross-Regional Comparison of Acropora White Syndrome in a Species-Rich Region (American Samoa)  
1042 with a Species-Poor Region (Northwestern Hawaiian Islands). *Journal of Marine Biology* **2010**, *2011*, 1–8,  
1043 doi:10.1155/2011/490198.
- 1044 115. Elton, C.S. *The Biology of Invasions by Animals and Plants*; John Wiley and Sons, New York, 1958;
- 1045 116. Plank, J.E. *Plant Diseases-Epidemics and Control Academic Press New York; USA*, 1963;
- 1046 117. Hobbs, J.-P.A.; Frisch, A.J.; Newman, S.J.; Wakefield, C.B. Selective Impact of Disease on Coral  
1047 Communities: Outbreak of White Syndrome Causes Significant Total Mortality of Acropora Plate Corals.  
1048 *PLoS one* **2015**, *10*, e0132528, doi:10.1371/journal.pone.0132528.
- 1049 118. Amaro, C.; Biosca, E.G. *Vibrio vulnificus* biotype 2, pathogenic for eels, is also an opportunistic pathogen  
1050 for humans. *Appl. Environ. Microbiol.* **1996**, *62*, 1454–1457.
- 1051 119. Cervino, J.M.; Hayes, R.L.; Polson, S.W.; Polson, S.C.; Goreau, T.J.; Martinez, R.J.; Smith, G.W. Relationship  
1052 of *Vibrio* Species Infection and Elevated Temperatures to Yellow Blotch/Band Disease in Caribbean Corals.  
1053 *Appl. Environ. Microbiol.* **2004**, *70*, 6855–6864, doi:10.1128/AEM.70.11.6855-6864.2004.
- 1054 120. Linkous, D.A.; Oliver, J.D. Pathogenesis of *Vibrio vulnificus*. *FEMS Microbiol Lett* **1999**, *174*, 207–214,  
1055 doi:10.1111/j.1574-6968.1999.tb13570.x.
- 1056 121. Milton, D.L.; Norqvist, A.; Wolf-Watz, H. Cloning of a metalloprotease gene involved in the virulence  
1057 mechanism of *Vibrio anguillarum*. *Journal of Bacteriology* **1992**, *174*, 7235–7244, doi:10.1128/jb.174.22.7235-  
1058 7244.1992.
- 1059 122. Sussman, M.; Willis, B.L.; Victor, S.; Bourne, D.G. Coral Pathogens Identified for White Syndrome ( WS )  
1060 Epizootics in the Indo-Pacific. **2008**, *3*, doi:10.1371/journal.pone.0002393.
- 1061 123. Ushijima, B.; Videau, P.; Burger, A.H.; Shore-Maggio, A.; Runyon, C.M.; Sudek, M.; Aeby, G.S.; Callahan,  
1062 S.M. *Vibrio coralliilyticus* Strain OCN008 Is an Etiological Agent of Acute Montipora White Syndrome.  
1063 *Appl. Environ. Microbiol.* **2014**, *80*, 2102–2109, doi:10.1128/AEM.03463-13.
- 1064 124. Ushijima, B.; Smith, A.; Aeby, G.S.; Callahan, S.M. *Vibrio owensii* Induces the Tissue Loss Disease  
1065 Montipora White Syndrome in the Hawaiian Reef Coral *Montipora capitata*. *PLOS ONE* **2012**, *7*, e46717,  
1066 doi:10.1371/journal.pone.0046717.
- 1067 125. Sheridan, C.; Grosjean, Ph.; Leblud, J.; Palmer, C.V.; Kushmaro, A.; Eeckhaut, I. Sedimentation rapidly  
1068 induces an immune response and depletes energy stores in a hard coral. *Coral Reefs* **2014**, *33*, 1067–1076,  
1069 doi:10.1007/s00338-014-1202-x.
- 1070 126. Heron, S.F.; Willis, B.L.; Skirving, W.J.; Eakin, C.M.; Page, C.A.; Miller, I.R. Summer Hot Snaps and Winter  
1071 Conditions: Modelling White Syndrome Outbreaks on Great Barrier Reef Corals. *PLOS ONE* **2010**, *5*,  
1072 e12210, doi:10.1371/journal.pone.0012210.

- 1073 127. Altizer, S.; Ostfeld, R.S.; Johnson, P.T.J.; Kutz, S.; Harvell, C.D. Climate change and infectious diseases:  
1074 from evidence to a predictive framework. *Science (New York, N.Y.)* **2013**, *341*, 514–9,  
1075 doi:10.1126/science.1239401.
- 1076 128. Barneah, O.; Brickner, I.; Hooge, M.; Weis, V.M.; LaJeunesse, T.C.; Benayahu, Y. Three party symbiosis:  
1077 acoelomorph worms, corals and unicellular algal symbionts in Eilat (Red Sea). *Mar Biol* **2007**, *151*, 1215–  
1078 1223, doi:10.1007/s00227-006-0563-2.
- 1079 129. Naumann, M.S.; Mayr, C.; Struck, U.; Wild, C. Coral mucus stable isotope composition and labeling :  
1080 experimental evidence for mucus uptake by epizoic acoelomorph worms. **2010**, 2521–2531,  
1081 doi:10.1007/s00227-010-1516-3.
- 1082 130. Wijgerde, T.; Schots, P.; Onselen, E. Van; Janse, M.; Karruppanan, E.; Verreth, J.A.J.; Osinga, R. Epizoic  
1083 acoelomorph flatworms impair zooplankton feeding by the scleractinian coral *Galaxea fascicularis*. **2012**,  
1084 doi:10.1242/bio.20122741.
- 1085 131. McClanahan, T.R. Primary succession of coral-reef algae: Differing patterns on fished versus unfished  
1086 reefs. *Journal of Experimental Marine Biology and Ecology* **1997**, *218*, 77–102, doi:10.1016/S0022-0981(97)00069-  
1087 5.
- 1088 132. Vermeij, M.J.A.; van Moorselaar, I.; Engelhard, S.; Hörnlein, C.; Vonk, S.M.; Visser, P.M. The effects of  
1089 nutrient enrichment and herbivore abundance on the ability of turf algae to overgrow coral in the  
1090 Caribbean. *PLoS ONE* **2010**, *5*, 1–8, doi:10.1371/journal.pone.0014312.
- 1091 133. Hughes, T.P.; Rodrigues, M.J.; Bellwood, D.R.; Ceccarelli, D.; Hoegh-Guldberg, O.; McCook, L.;  
1092 Moltschaniwskyj, N.; Pratchett, M.S.; Steneck, R.S.; Willis, B. Phase shifts, herbivory, and the resilience of  
1093 coral reefs to climate change. *Current biology : CB* **2007**, *17*, 360–5, doi:10.1016/j.cub.2006.12.049.
- 1094 134. Leichter, J.J.; Wankel, S.; Paytan, A.; Hanson, K.; Miller, S.; Altabet, M.A. Nitrogen and oxygen isotopic  
1095 signatures of subsurface nitrate seaward of the Florida Keys reef tract. *Limnol. Oceanogr.* **2007**, *52*, 1258–  
1096 1267, doi:10.4319/lo.2007.52.3.1258.
- 1097 135. Leichter, J.J.; Stewart, H.L.; Miller, S.L. Episodic nutrient transport to Florida coral reefs. *Limnol. Oceanogr.*  
1098 **2003**, *48*, 1394–1407, doi:10.4319/lo.2003.48.4.1394.
- 1099 136. Boggs, G.; Edyvane, K.; de Carvalho, N.; Penny, S.; Rouwenhorst, J.; Brocklehurst, P.; Cowie, I.; Barreto,  
1100 C.; Amaral, A.; Monteiro, J.; et al. *Marine and Coastal Habitat Mapping in Timor Leste (North Coast) - Final*  
1101 *Report*; Ministry of Agriculture & Fisheries, Government of Timor Leste, 2012;
- 1102 137. Risk, M.J.; Lapointe, B.E.; Sherwood, O. a; Bedford, B.J. The use of delta(15)N in assessing sewage stress on  
1103 coral reefs. *Marine pollution bulletin* **2009**, *58*, 793–802, doi:10.1016/j.marpolbul.2009.02.008.
- 1104 138. Burgett, J. *Summary of Algal Community Changes Observed on the Southwest Arm of Rose Atoll from 1995-2002*;  
1105 USFWS: Honolulu, 2012;
- 1106 139. Thacker, R.W.; Ginsburg, D.W.; Paul, V.J. Effects of herbivore exclusion and nutrient enrichment on coral  
1107 reef macroalgae and cyanobacteria. *Coral Reefs* **2001**, *19*, 318–329, doi:10.1007/s003380000122.
- 1108 140. Littler, M.M.; Littler, D.S.; Brooks, B.L. Harmful algae on tropical coral reefs: Bottom-up eutrophication  
1109 and top-down herbivory. *Harmful Algae* **2006**, *5*, 565–585, doi:10.1016/j.hal.2005.11.003.
- 1110 141. Osawa, Y.; Fujita, K.; Umezawa, Y.; Kayanne, H.; Ide, Y.; Nagaoka, T.; Miyajima, T.; Yamano, H. Human  
1111 impacts on large benthic foraminifers near a densely populated area of Majuro Atoll, Marshall Islands.  
1112 *Marine Pollution Bulletin* **2010**, *60*, 1279–1287, doi:10.1016/j.marpolbul.2010.03.014.
- 1113 142. Smith, J.; Smith, C.; Hunter, C. An experimental analysis of the effects of herbivory and nutrient enrichment  
1114 on benthic community dynamics on a Hawaiian reef. *Coral Reefs* **2001**, *19*, 332–342,  
1115 doi:10.1007/s003380000124.
- 1116 143. Titlyanov, E.A.; Kiyashko, S.I.; Titlyanova, T.V.; Huyen, P.V.; Yakovleva, I.M. Identifying nitrogen sources  
1117 for macroalgal growth in variously polluted coastal areas of southern Vietnam. *Botanica Marina* **2011**, *54*,  
1118 doi:10.1515/bot.2011.041.
- 1119 144. Costanzo, S.D.; Udy, J.; Longstaff, B.; Jones, A. Using nitrogen stable isotope ratios ( $\delta^{15}\text{N}$ ) of macroalgae  
1120 to determine the effectiveness of sewage upgrades: changes in the extent of sewage plumes over four years  
1121 in Moreton Bay, Australia. *Marine Pollution Bulletin* **2005**, *51*, 212–217, doi:10.1016/j.marpolbul.2004.10.018.
- 1122 145. Thornber, C.S.; Kinlan, B.P.; Graham, M.H.; Stachowicz, J.J. Population ecology of the invasive kelp  
1123 *Undaria pinnatifida* in California: environmental and biological controls on demography. *Marine Ecology*  
1124 *Progress Series* **2004**, *268*, 69–80, doi:10.3354/meps268069.

- 1125 146. Smith, J.E.; Runcie, J.W.; Smith, C.M. Characterization of a large-scale ephemeral bloom of the green alga  
1126 *Cladophora sericea* on the coral reefs of West Maui, Hawai'i. *Marine Ecology Progress Series* **2005**, *302*, 77–  
1127 91, doi:10.3354/meps302077.
- 1128 147. Fourqurean, J.W.; Moore, T.O.; Fry, B.; Hollibaugh, J.T. Spatial and temporal variation in C:N:P ratios,  
1129  $\delta^{15}\text{N}$ , and  $\delta^{13}\text{C}$  of eelgrass *Zostera marina* as indicators of ecosystem processes, Tomales Bay, California,  
1130 USA. *Marine Ecology Progress Series* **1997**, *157*, 147–157.
- 1131 148. Gordon, A.L. The Indonesian Seas. *Oceanography* **2005**, *18*, 14–27.
- 1132 149. Liu, G.; Rauenzahn, J.L.; Heron, S.; Eakin, C.M.; Skirving, W.J.; Christensen, T.R.L.; Strong, A.E.; Li, J.  
1133 NOAA Coral Reef Watch 50 km Satellite Sea Surface Temperature-Based Decision Support System for Coral  
1134 Bleaching Management; Washington D.C., 2013;
- 1135 150. Sprintall, J.; Gordon, A.L.; Koch-Larrouy, A.; Lee, T.; Potemra, J.T.; Pujiana, K.; Wijffels, S. The Indonesian  
1136 seas and their role in the coupled ocean–climate system. *Nature Geoscience* **2014**, *7*, 487–492.
- 1137 151. Feely, R.A.; Sabine, C.L.; Hernandez-Ayon, J.M.; Ianson, D.; Hales, B. Evidence for Upwelling of Corrosive  
1138 “Acidified” Water onto the Continental Shelf. *Science* **2008**, *320*, 1490–1492, doi:10.1126/science.1155676.
- 1139 152. Leichter, J.J.; Genovese, S.J. Intermittent upwelling and subsidized growth of the scleractinian coral  
1140 *Madracis mirabilis* on the deep fore-reef slope of Discovery Bay, Jamaica. *Marine Ecology Progress Series*  
1141 **2006**, *316*, 95–103, doi:10.3354/meps316095.
- 1142 153. Rixen, T.; Jiménez, C.; Cortés, J. Impact of upwelling events on the sea water carbonate chemistry and  
1143 dissolved oxygen concentration in the Gulf of Papagayo (Culebra Bay), Costa Rica: Implications for coral  
1144 reefs. *RBT* **2015**, *60*, 187, doi:10.15517/rbt.v60i2.20004.
- 1145 154. IPCC *Global Warming of 1.5°C Summary for Policymakers*; 2018;
- 1146 155. ADB *State of the Coral Triangle: Timor-Leste*; Asian Development Bank: Mandaluyong City, Philippines,  
1147 2014; p. 57;.
- 1148 156. Alonso Población, E. Fisheries and food security in Timor-Leste: the effects of ritual meat exchanges and  
1149 market chains on fishing. *Food Sec.* **2013**, *5*, 807–816, doi:10.1007/s12571-013-0308-2.
- 1150 157. McWilliam, A. New beginnings in East Timorese forest management. *Journal of Southeast Asian Studies* **2003**,  
1151 307–327.
- 1152 158. Miyazawa, N. Customary law and community-based natural resource management in post-conflict Timor-  
1153 Leste. *Land and post-conflict peacebuilding* **2013**, 511–532.
- 1154 159. Yoder, L.S.M. Custom, codification, collaboration: Integrating the legacies of land and forest authorities in  
1155 Oecusse Enclave, East Timor. **2005**.
- 1156 160. Beyer, H.L.; Kennedy, E.V.; Beger, M.; Chen, C.A.; Cinner, J.E.; Darling, E.S.; Eakin, C.M.; Gates, R.D.;  
1157 Heron, S.F.; Knowlton, N.; et al. Risk-sensitive planning for conserving coral reefs under rapid climate  
1158 change. *Conservation Letters* **2018**, *11*, e12587, doi:10.1111/conl.12587.
- 1159 161. Hoegh-Guldberg, O.; Kennedy, E.V.; Beyer, H.L.; McClennen, C.; Possingham, H.P. Securing a Long-term  
1160 Future for Coral Reefs. *Trends in Ecology & Evolution* **2018**, *33*, 936–944, doi:10.1016/j.tree.2018.09.006.
- 1161 162. Lamb, J.B.; Willis, B.L.; Fiorenza, E.A.; Couch, C.S.; Howard, R.; Rader, D.N.; True, J.D.; Kelly, L.A.; Ahmad,  
1162 A.; Jompa, J.; et al. Plastic waste associated with disease on coral reefs. *Science* **2018**, *359*, 460–462,  
1163 doi:10.1126/science.aar3320.
- 1164 163. Lamb, J.B.; Water, J.A.J.M.V.D.; Bourne, D.G.; Altier, C. Seagrass ecosystems reduce exposure to bacterial  
1165 pathogens of humans, fishes, and invertebrates. **2017**, *355*, 731–733, doi:10.1126/science.aal1956.
- 1166 164. Sabdono, A.; Radjasa, O.K.; Trianto, A.; Sarjito; Munasik; Wijayanti, D.P. Preliminary study of the effect of  
1167 nutrient enrichment, released by marine floating cages, on the coral disease outbreak in Karimunjawa,  
1168 Indonesia. *Regional Studies in Marine Science* **2019**, *30*, 100704, doi:10.1016/j.rsma.2019.100704.
- 1169 165. Haapkylä, J.; Seymour, A.S.; Trebilco, J.; Smith, D. Coral disease prevalence and coral health in the  
1170 Wakatobi Marine Park, south-east Sulawesi, Indonesia. *J. Mar. Biol. Ass. U.K.* **2007**, *87*, 403–414,  
1171 doi:10.1017/S0025315407055828.
- 1172 166. Raymundo, L.J.; Licuanan, W.L.; Kerr, A.M. Adding insult to injury: Ship groundings are associated with  
1173 coral disease in a pristine reef. *PLoS One* **2018**, *13*, e0202939, doi:10.1371/journal.pone.0202939.
- 1174 167. Raymundo, L.; Diaz, R.; Miller, A.; Reynolds, T. *Baseline Surveys of Proposed and Established Marine*  
1175 *Sanctuaries on Bantayan Island, Northern Cebu*; University of Guam, 2011; p. 64;.
- 1176 168. Raymundo, L.J.; Halford, A.R.; Maypa, A.P.; Kerr, A.M. Functionally diverse reef-fish communities  
1177 ameliorate coral disease. *PNAS* **2009**, *106*, 17067–70, doi:10.1073/pnas.0900365106.



- 1178 169. Kaczmarek, L.T. Coral disease dynamics in the central Philippines. *Diseases of Aquatic Organisms* **2006**, *69*,  
1179 9–21, doi:10.3354/dao069009.
- 1180 170. Raymundo, L.J.; Resell, K.B.; Reboton, C.T.; Kaczmarek, L. Coral diseases on Philippine reefs: Genus  
1181 Porites is a dominant host. *Diseases of Aquatic Organisms* **2005**, *64*, 181–191, doi:10.3354/dao064181.
- 1182 171. Raymundo, L.J.H.; Harvell, C.D.; Reynolds, T.L. Porites ulcerative white spot disease: Description,  
1183 prevalence, and host range of a new coral disease affecting Indo-Pacific reefs. *Diseases of Aquatic Organisms*  
1184 **2003**, *56*, 95–104, doi:10.3354/dao056095.
- 1185 172. Miller, J.; Sweet, M.J.; Wood, E.; Bythell, J. Baseline coral disease surveys within three marine parks in  
1186 Sabah, Borneo. *PeerJ* **2015**, *3*, e1391, doi:10.7717/peerj.1391.
- 1187 173. Green, E.P.; Bruckner, A.W. The significance of coral disease epizootiology for coral reef conservation.  
1188 *Biological Conservation* **2000**, *96*, 347–361, doi:10.1016/S0006-3207(00)00073-2.
- 1189 174. Hobbs, J.-P.A.; Frisch, A.J.; Newman, S.J.; Wakefield, C.B. Selective Impact of Disease on Coral  
1190 Communities: Outbreak of White Syndrome Causes Significant Total Mortality of Acropora Plate Corals.  
1191 *PLoS ONE* **2015**, *10*, e0132528, doi:10.1371/journal.pone.0132528.
- 1192 175. Williams, G.J.; Work, T.M.; Aeby, G.S.; Knapp, I.S.; Davy, S.K. Gross and microscopic morphology of  
1193 lesions in Cnidaria from Palmyra Atoll, Central Pacific. *Journal of Invertebrate Pathology* **2011**, *106*, 165–173,  
1194 doi:10.1016/j.jip.2010.08.002.
- 1195 176. Yasuda, N.; Nakano, Y.; Yamashiro, H.; Hidaka, M. Skeletal structure and progression of growth anomalies  
1196 in Porites australiensis in Okinawa, Japan. *Dis. Aquat. Org.* **2012**, *97*, 237–247, doi:10.3354/dao02408.
- 1197 177. Aeby, G.S. The potential effect on the ability of a coral intermediate host to regenerate has had on the  
1198 evolution of its association with a marine parasite. In Proceedings of the Proc 7th Int Coral Reef Symp 2;  
1199 1992; pp. 809–815.
- 1200 178. Aeby, G.S. Corals in the genus Porites are susceptible to infection by a larval trematode. *Coral Reefs* **2003**,  
1201 *22*, 216, doi:10.1007/s00338-003-0310-9.
- 1202 179. Zvuloni, A.; Armoza-Zvuloni, R.; Loya, Y. Structural deformation of branching corals associated with the  
1203 vermetid gastropod *Dendropoma maxima*. *Marine Ecology Progress Series* **2008**, *363*, 103–108,  
1204 doi:10.3354/meps07473.
- 1205 180. Scott, P.J.B.; Risk, M.J. The effect of Lithophaga (Bivalvia: Mytilidae) boreholes on the strength of the coral  
1206 Porites lobata. *Coral Reefs* **1988**, *7*, 145–151, doi:10.1007/BF00300974.
- 1207 181. Hoeksema, B.W.; Farenzena, Z. Tissue loss in corals infested by acoelomorph flatworms (*Waminoa* sp.).  
1208 *Coral Reefs* **2012**, *31*, 869, doi:10.1007/s00338-012-0919-7.
- 1209 182. Haapkylä, J.; Seymour, A.S.; Barneah, O.; Brickner, I.; Hennige, S.; Suggett, D. Association of *Waminoa* sp.  
1210 (Acoela) with corals in the Wakatobi Marine Park, South-East Sulawesi, Indonesia. **2009**, 1021–1027,  
1211 doi:10.1007/s00227-009-1145-x.
- 1212 183. Rodríguez-Villalobos, J.C.; Work, T.M.; Calderon-Aguilera, L.E.; Reyes-Bonilla, H.; Hernández, L.  
1213 Explained and unexplained tissue loss in corals from the Tropical Eastern Pacific. **2015**, *116*, 121–131,  
1214 doi:10.3354/dao02914.
- 1215 184. Williams, G.J.; Work, T.M.; Aeby, G.S.; Knapp, I.S.; Davy, S.K. Gross and microscopic morphology of  
1216 lesions in Cnidaria from Palmyra Atoll, Central Pacific. *Journal of Invertebrate Pathology* **2011**, *106*, 165–173,  
1217 doi:10.1016/j.jip.2010.08.002.
- 1218 185. Keats, D.W.; Chamberlain, Y.M.; Baba, M. a Widespread Indo-Pacific Non-Geniculate Coralline Alga that  
1219 Overgrows and Kills Live Coral. **1997**, *40*, 263–279.
- 1220 186. Finckh, A.E. Biology of the reef-forming organisms at Funafuti Atoll. In *The atoll of Funafuti*; Royal Society  
1221 London, 1904; pp. 125–150.
- 1222 187. Benzoni, F.; Basso, D. Hydrolithon spp. (Rhodophyta, Corallinales) overgrow live corals (Cnidaria,  
1223 Scleractinia) in Yemen. *Marine Biology* **2011**, *158*, 2419–2428, doi:10.1007/s00227-011-1743-2.
- 1224 188. Smith, T.B.; Nemeth, R.S.; Blondeau, J.; Calnan, J.M.; Kadison, E.; Herzlieb, S. Assessing coral reef health  
1225 across onshore to offshore stress gradients in the US Virgin Islands. *Marine Pollution Bulletin* **2008**, *56*, 1983–  
1226 1991, doi:10.1016/j.marpolbul.2008.08.015.
- 1227 189. Kuffner, I.B.; Walters, L.J.; Becerro, M.A.; Paul, V.J.; Ritson-Williams, R.; Beach, K.S. Inhibition of coral  
1228 recruitment by macroalgae and cyanobacteria. **2006**, *323*, 107–117.
- 1229 190. Cetz-Navarro, N.; Espinoza-Avalos, J.; Hernandez-Arana, H.; Carricart-Ganivet, J. Biological Responses of  
1230 the Coral *Montastraea annularis* to the Removal of Filamentous Turf Algae. *PLoS ONE* **2013**, *8*, 1–9,  
1231 doi:10.1371/journal.pone.0054810.

- 1232 191. Loh, T.; Pawlik, J.R. Friend or foe? No evidence that association with the sponge *Mycale laevis* provides a  
1233 benefit to corals of the genus *Montastraea*. *Marine Ecology Progress Series* **2012**, *465*, 111–117,  
1234 doi:10.3354/meps09904.
- 1235 192. Rutzler, K.; Muzik, K. *Terpios hoshinota*, a new cyanobacteriosponge threatening Pacific reefs. *Sci Mar*  
1236 *57*:395–403. *Sci Mar* **1993**, *57*, 395–403.
- 1237 193. Bak, R.; DYM, L.; Joenje, M.; Nieuwland, G.; Van Veghel, M. Long-term changes on coral reefs in booming  
1238 populations of a competitive colonial ascidian. *Marine Ecology Progress Series* **1996**, *133*, 303–306.
- 1239 194. Littler, M.M.; Littler, D.S. A colonial tunicate smothers corals and corraline algae on the Great Astrolabe  
1240 Reef, Fiji. *Coral Reefs* **1995**, *14*, 148–149.
- 1241 195. Vargas-Ángel, B.; Godwin, L.; Brainard, R. Invasive didemnid tunicate spreading across coral reefs at  
1242 remote Swains Island, American Samoa. *Coral Reefs* **2009**, *28*, 53, doi:10.1007/s00338-008-0428-x.
- 1243 196. Ravindran, J.; Raghukumar, C. Pink-line syndrome, a physiological crisis in the scleractinian coral *Porites*  
1244 *lutea*. **2006**, 347–356, doi:10.1007/s00227-005-0192-1.
- 1245 197. Eyre, B. Nutrient Biogeochemistry in the Tropical Moresby River Estuary System North Queensland,  
1246 Australia. *Estuarine, Coastal and Shelf Science* **1994**, *39*, 15–31.
- 1247 198. Mitchell, A.W.; Bramley, R.G.V.; Johnson, A.K.L. Export of nutrients and suspended sediment during a  
1248 cyclone-mediated flood event in the Herbert River catchment, Australia. *Mar. Freshwater Res.* **1997**, *48*, 79,  
1249 doi:10.1071/MF96021.
- 1250 199. Robertson, A.I.; Dixon, P.; Alongi, D.M. The Influence of Fluvial Discharge on Pelagic Production in the  
1251 Gulf of Papua, Northern Coral Sea. *Estuarine, Coastal and Shelf Science* **1998**, *46*, 319–331,  
1252 doi:10.1006/ecss.1997.0270.
- 1253 200. Alongi, D.M.; Boto, K.; Robertson, A. Nitrogen and phosphorus cycles. In *Tropical Mangrove Ecosystems*;  
1254 Robertson, A.I., Alongi, D.M., Eds.; American Geophysical Union (AGU): Washington D.C., 1992.  
1255

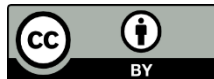

© 2020 by the authors. Submitted for possible open access publication under the terms and conditions of the Creative Commons Attribution (CC BY) license (<http://creativecommons.org/licenses/by/4.0/>).
